# Supplementary material for: Evaluating the impact of malaria rapid diagnostic tests on patient-important outcomes in sub-Saharan Africa: a systematic review of study methods to guide effective implementation
Source: HighWire-hosted journal article supplement (doi:10.1136/bmjopen-2023-077361), 2024-09-01
Supplement: bmjopen-2023-077361supp001_data_supplement.pdf [file bmjopen-2023-077361supp001_data_supplement.pdf]

**Supplementary file 2: Full search strategies****Part 1: MEDLINE (PubMed) Search Strategy**

| Search set | MEDLINE (PubMed) <from inception up to 02 May 2022>                                                                                                                                                        |
|------------|------------------------------------------------------------------------------------------------------------------------------------------------------------------------------------------------------------|
| 1          | Exp Malaria[MeSH]                                                                                                                                                                                          |
| 2          | Exp Plasmodium [MeSH]                                                                                                                                                                                      |
| 3          | Malaria [Title/Abstract]                                                                                                                                                                                   |
| 4          | 1 or 2 or 3                                                                                                                                                                                                |
| 5          | Exp Reagent kits, diagnostics [MeSH]                                                                                                                                                                       |
| 6          | rapid diagnos* test* [Title/Abstract]                                                                                                                                                                      |
| 7          | RDT* [Title/Abstract]                                                                                                                                                                                      |
| 8          | “point of care” [Title/Abstract]                                                                                                                                                                           |
| 9          | Dipstick* [Title/Abstract]                                                                                                                                                                                 |
| 10         | Rapid diagnos* device* [Title/Abstract]                                                                                                                                                                    |
| 11         | MRDT [Title/Abstract]                                                                                                                                                                                      |
| 12         | OptiMal [Title/Abstract]                                                                                                                                                                                   |
| 13         | Binax NOW [Title/Abstract]                                                                                                                                                                                 |
| 14         | ParaSight [Title/Abstract]                                                                                                                                                                                 |
| 15         | Rapid test* [Title/Abstract]                                                                                                                                                                               |
| 16         | Card test* [Title/Abstract]                                                                                                                                                                                |
| 17         | Rapid AND (detection* or diagnos*) [Title/Abstract]                                                                                                                                                        |
| 18         | 5 or 6 or 7 or 8 or 9 or 10 or 11 or 12 or 13 or 14 or 15 or 16 or 17                                                                                                                                      |
| 19         | 4 and 18                                                                                                                                                                                                   |
| 20         | Mortality [Mesh] OR Morbidity [Mesh] OR Prognosis [Mesh]                                                                                                                                                   |
| 21         | Treatment Outcome [Mesh] OR Length of Stay [Mesh] or "Time-to-Treatment"[Mesh] or "Quality of Life"[Mesh]                                                                                                  |
| 22         | "Cost-Benefit Analysis"[Mesh] or “cost-effectiveness “[Title/Abstract]                                                                                                                                     |
| 23         | endpoint* OR outcome* OR mortality OR prognosis OR prognostic or burden or "case detection" or "time to diagnosis" [Title/Abstract]                                                                        |
| 24         | impact* OR effect* or "treatment initiation" OR benefit* or “birth weight” or “adverse events” or safety [Title/Abstract]                                                                                  |
| 25         | Prescription* or prescribing or fever or “case management” or anti-malarial* or antimalarial* or antibiotic* or compliance or Follow-up or “empirical treatment” or “syndromic treatment” [Title/Abstract] |
| 26         | Antimalarials/administration & dosage/therapeutic use [Mesh]                                                                                                                                               |
| 27         | Perception* or experience* or feasibility or acceptance or acceptability [Title/Abstract]                                                                                                                  |
| 28         | Drug Prescriptions [Mesh] or "Medication Adherence"[Mesh] or "Patient Acceptance of Health Care"[Mesh]                                                                                                     |
| 29         | 20 or 21 or 22 or 23 or 24 or 25 or 26 or 27 or 28                                                                                                                                                         |
| 30         | 18 and 29                                                                                                                                                                                                  |

**Part 2: EMBASE Search Strategy**

| Search Set | EMBASE <1996 to 2022 week 17>                                                                        |
|------------|------------------------------------------------------------------------------------------------------|
| 1          | malaria/ or malaria.mp.                                                                              |
| 2          | Plasmodium/ or plasmodium.mp.                                                                        |
| 3          | 1 or 2                                                                                               |
| 4          | ("rapid diagnos* test*" or RDT* or dipstick).ab. or ("rapid diagnos* test*" or RDT* or dipstick).ti. |

|    |                                                                                                                                                                                                                                                                                                                                                                                                        |
|----|--------------------------------------------------------------------------------------------------------------------------------------------------------------------------------------------------------------------------------------------------------------------------------------------------------------------------------------------------------------------------------------------------------|
| 5  | ("point of care" or "Rapid diagnos* device* " or MRDD or "Binax NOW " or ParaSight or "Rapid test* " or "card test*").ab.                                                                                                                                                                                                                                                                              |
| 6  | ("point of care" or "Rapid diagnos* device* " or MRDD or "Binax NOW " or ParaSight or "Rapid test* " or "card test*").ti.                                                                                                                                                                                                                                                                              |
| 7  | ("molecular diagnosis" or "molecular diagnostics").ti. or ("molecular diagnosis" or "molecular diagnostics").ab.                                                                                                                                                                                                                                                                                       |
| 8  | 4 or 5 or 6 or 7                                                                                                                                                                                                                                                                                                                                                                                       |
| 9  | 3 and 8                                                                                                                                                                                                                                                                                                                                                                                                |
| 10 | (mortality or morbidity or prognosis).ti. or (mortality or morbidity or prognosis).ab.                                                                                                                                                                                                                                                                                                                 |
| 11 | outcome*.ti. or outcome*.ab.                                                                                                                                                                                                                                                                                                                                                                           |
| 12 | quality of life.mp. or "quality of life"/                                                                                                                                                                                                                                                                                                                                                              |
| 13 | "Costs and Cost Analysis"/                                                                                                                                                                                                                                                                                                                                                                             |
| 14 | (endpoint* or burden or "case detection" or "time to diagnosis").ti. or (endpoint* or burden or "case detection" or "time to diagnosis").ab.                                                                                                                                                                                                                                                           |
| 15 | (impact* or effect* or "treatment initiation" or benefit* or " birth weight" or " adverse events" or safety).ti. or (impact* or effect* or "treatment initiation" or benefit* or " birth weight" or " adverse events" or safety).ab.                                                                                                                                                                   |
| 16 | (Prescription* or prescribing or fever or " case management" or anti-malarial* or antimalarial* or antibiotic* or compliance or Follow-up or " empirical treatment" or "syndromic treatment").ti. or (Prescription* or prescribing or fever or " case management" or anti-malarial* or antimalarial* or antibiotic* or compliance or Follow-up or " empirical treatment" or "syndromic treatment").ab. |
| 17 | (Perception* or experience* or feasibility or acceptance or acceptability).ti. or (Perception* or experience* or feasibility or acceptance or acceptability).ab.                                                                                                                                                                                                                                       |
| 18 | 10 or 11 or 12 or 13 or 14 or 15 or 16 or 17                                                                                                                                                                                                                                                                                                                                                           |
| 19 | 9 and 18                                                                                                                                                                                                                                                                                                                                                                                               |

### Part 3: Cochrane Library Search Strategy

| Search set | Cochrane Library <issue 4 of 12, April 2022>                                                                                                                                         |
|------------|--------------------------------------------------------------------------------------------------------------------------------------------------------------------------------------|
| 1          | malaria:ti,ab,kw or plasmodium:ti,ab,kw                                                                                                                                              |
| 2          | "rapid diagnos* test*" or RDT* or dipstick:ti,ab,kw                                                                                                                                  |
| 3          | "point of care" or "Rapid diagnos* device* " or MRDD:ti,ab,kw or "Binax NOW " or ParaSight or "Rapid test* " or "card test*":ti,ab,kw or Rapid and (detection* or diagnos*):ti,ab,kw |
| 4          | MeSH descriptor: [Reagent Kits, Diagnostic] explode all trees                                                                                                                        |
| 5          | #2 or #3 or #4                                                                                                                                                                       |
| 6          | #1 and #5                                                                                                                                                                            |
| 7          | MeSH descriptor: [Mortality] explode all trees                                                                                                                                       |
| 8          | MeSH descriptor: [Morbidity] explode all trees                                                                                                                                       |
| 9          | MeSH descriptor: [Prognosis] explode all trees                                                                                                                                       |
| 10         | MeSH descriptor: [Treatment Outcome] explode all trees                                                                                                                               |
| 11         | MeSH descriptor: [Length of Stay] explode all trees                                                                                                                                  |
| 12         | MeSH descriptor: [Time-to-Treatment] explode all trees                                                                                                                               |
| 13         | MeSH descriptor: [Quality of Life] explode all trees                                                                                                                                 |

|    |                                                                                                                                                                                                    |
|----|----------------------------------------------------------------------------------------------------------------------------------------------------------------------------------------------------|
| 14 | MeSH descriptor: [Cost-Benefit Analysis] explode all trees                                                                                                                                         |
| 15 | cost-effectiveness:ti,ab,kw (Word variations have been searched)                                                                                                                                   |
| 16 | endpoint* or outcome* or mortality or prognosis or prognostic or burden or "case detection" or "time to diagnosis":ti,ab,kw                                                                        |
| 17 | impact* or effect* or "treatment initiation" or benefit* or "birth weight" or "adverse events" or safety:ti,ab,kw                                                                                  |
| 18 | Prescription* or prescribing or fever or "case management" or anti-malarial* or antimalarial* or antibiotic* or compliance or Follow-up or "empirical treatment" or "syndromic treatment":ti,ab,kw |
| 19 | MeSH descriptor: [Antimalarials] explode all trees                                                                                                                                                 |
| 20 | Perception* or experience* or feasibility or acceptance or acceptability:ti,ab,kw (Word variations have been searched)                                                                             |
| 21 | MeSH descriptor: [Drug Prescriptions] explode all trees                                                                                                                                            |
| 22 | MeSH descriptor: [Medication Adherence] explode all trees                                                                                                                                          |
| 23 | MeSH descriptor: [Patient Acceptance of Health Care] explode all trees                                                                                                                             |
| 24 | #7 or #8 or #9 or #10 or #11 or #12 or #13 or #14 or #15 or #16 or #17 or #18 or #19 or #20 or #21 or #22 or #23                                                                                   |
| 25 | #6 and #24                                                                                                                                                                                         |

**Part 4: Africa Index Medicus Search strategy**

Malaria or plasmodium [Words] and diagnosis or diagnostic or RDT\$ [Words] and endpoint\$ or outcome\$ or mortality or prognosis or prescription\$ or attitude\$ or experience or perception or benefit [Words]

**Part 5: Clinical Trial Registries Search Strategies**

- Clinicaltrials.gov  
Rapid diagnostic test | Malaria
- WHO ICTRP  
Malaria and (rapid diagnostic test\* or RDT\*)
- Meta-register of controlled trials (mRCT)  
Malaria and (rapid diagnostic test\* or RDT\*)
- Pan African Clinical Trials Registry  
Malaria and (rapid diagnostic test\* or RDT\*)

Supplementary file 3: National Institute of Health (NIH) tool used to assess the methodological quality of included studies

Part 1: Quality assessment of controlled intervention studies

| Criteria                                                                                           | Description                                                                                                                                                                                                                                                                                                                                                                                                                                                                                                                                            |
|----------------------------------------------------------------------------------------------------|--------------------------------------------------------------------------------------------------------------------------------------------------------------------------------------------------------------------------------------------------------------------------------------------------------------------------------------------------------------------------------------------------------------------------------------------------------------------------------------------------------------------------------------------------------|
| Was the study described as randomized, a randomized trial, a randomized clinical trial, or an RCT? | Was the study described as randomized? A study does not satisfy quality criteria as randomized simply because the authors call it randomized; however, it is a first step in determining if a study is randomized                                                                                                                                                                                                                                                                                                                                      |
| Was the method of randomization adequate (i.e., use of randomly generated assignment)?             | Adequate randomization: Randomization is adequate if it occurred according to the play of chance (e.g., computer generated sequence in more recent studies, or random number table in older studies). If assignment is not by the play of chance, then the answer to this question is no.                                                                                                                                                                                                                                                              |
| Was the treatment allocation concealed (so that assignments could not be predicted)?               | This means that one does not know in advance, or cannot guess accurately, to what group the next person eligible for randomization will be assigned. Methods include sequentially numbered opaque sealed envelopes, numbered or coded containers, central randomization by a coordinating centre, computer-generated randomization that is not revealed ahead of time, etc.                                                                                                                                                                            |
| Were study participants and providers blinded to treatment group assignment?                       | Blinding means that one does not know to which group—intervention or control—the participant is assigned. It is also sometimes called "masking." The reviewer assessed whether each of the following was blinded to knowledge of treatment assignment: (1) the person assessing the primary outcome(s) for the study; (2) the person receiving the intervention; and (3) the person providing the intervention.<br><br>Sometimes the individual providing the intervention is the same person performing the outcome assessment. This should be noted. |
| Were the people assessing the outcomes blinded to the participants' group assignments?             |                                                                                                                                                                                                                                                                                                                                                                                                                                                                                                                                                        |
| Were the groups similar at baseline on important characteristics that could                        | This question relates to whether the intervention and control groups have similar baseline characteristics on average especially those characteristics that may affect the                                                                                                                                                                                                                                                                                                                                                                             |

|                                                                                                             |                                                                                                                                                                                                                                                                                                                                                                                                                                                                                                                                                    |
|-------------------------------------------------------------------------------------------------------------|----------------------------------------------------------------------------------------------------------------------------------------------------------------------------------------------------------------------------------------------------------------------------------------------------------------------------------------------------------------------------------------------------------------------------------------------------------------------------------------------------------------------------------------------------|
| affect outcomes (e.g., demographics, risk factors, co-morbid conditions)?                                   | intervention or outcomes. The point of randomized trials is to create groups that are as similar as possible except for the intervention(s) being studied in order to compare the effects of the interventions between groups. When reviewers abstracted baseline characteristics, they noted when there was a significant difference between groups.                                                                                                                                                                                              |
| Was the overall drop-out rate from the study at endpoint 20% or lower of the number allocated to treatment? | "Dropouts" in a clinical trial are individuals for whom there are no end point measurements, often because they dropped out of the study and were lost to follow up.<br><br>Generally, an acceptable overall dropout rate is considered 20 percent or less of participants who were randomized or allocated into each group. An acceptable differential dropout rate is an absolute difference between groups of 15 percentage points at most (calculated by subtracting the dropout rate of one group minus the dropout rate of the other group). |
| Was the differential drop-out rate (between treatment groups) at endpoint 15 percentage points or lower?    |                                                                                                                                                                                                                                                                                                                                                                                                                                                                                                                                                    |
| Was there high adherence to the intervention protocols for each treatment group?                            | Did participants in each treatment group adhere to the protocols for assigned interventions? For example, if one group that was assigned to receive a particular drug at a particular dose had a large percentage of participants who did not end up taking the drug or the dose as designed in the protocol.                                                                                                                                                                                                                                      |
| Were other interventions avoided or similar in the groups (e.g., similar background treatments)?            | Changes that occur in the study outcomes being assessed should be attributable to the interventions being compared in the study. If study participants receive interventions that are not part of the study protocol and could affect the outcomes being assessed, and they receive these interventions differentially, then there is cause for concern because these interventions could bias results.                                                                                                                                            |
| Were outcomes assessed using valid and reliable measures, implemented                                       | What tools or methods were used to measure the outcomes in the study? Were the tools and methods accurate and reliable—for example, have they been validated, or are they objective? This is important as it indicates the confidence you can have                                                                                                                                                                                                                                                                                                 |

|                                                                                                                                                                  |                                                                                                                                                                                                                                                                                                                                                      |
|------------------------------------------------------------------------------------------------------------------------------------------------------------------|------------------------------------------------------------------------------------------------------------------------------------------------------------------------------------------------------------------------------------------------------------------------------------------------------------------------------------------------------|
| consistently across all study participants?                                                                                                                      | in the reported outcomes. Perhaps even more important is ascertaining that outcomes were assessed in the same manner within and between groups.                                                                                                                                                                                                      |
| Did the authors report that the sample size was sufficiently large to be able to detect a difference in the main outcome between groups with at least 80% power? | Generally, a study's methods section will address the sample size needed to detect differences in primary outcomes. The current standard is at least 80 percent power to detect a clinically relevant difference in an outcome using a two-sided alpha of 0.05.                                                                                      |
| Were outcomes reported or subgroups analysed prespecified (i.e., identified before analyses were conducted)?                                                     | Investigators should pre specify outcomes reported in a study for hypothesis testing—which is the reason for conducting an RCT. Without prespecified outcomes, the study may be reporting ad hoc analyses, simply looking for differences supporting desired findings. Investigators also should pre specify subgroups being examined.               |
| Were all randomized participants analysed in the group to which they were originally assigned, i.e., did they use an intention-to-treat analysis?                | Intention-to-treat (ITT) means everybody who was randomized is analysed according to the original group to which they are assigned. This is an extremely important concept because conducting an ITT analysis preserves the whole reason for doing a randomized trial; that is, to compare groups that differ only in the intervention being tested. |

Part 2: Quality assessment tool for observational cohort and cross-sectional studies

| Criteria                                                             | Description                                                                                                                                                                                                                                                        |
|----------------------------------------------------------------------|--------------------------------------------------------------------------------------------------------------------------------------------------------------------------------------------------------------------------------------------------------------------|
| Was the research question or objective in this paper clearly stated? | Did the authors describe their goal in conducting this research? Is it easy to understand what they were looking to find? This issue is important for any scientific paper of any type. Higher quality scientific research explicitly defines a research question. |
| Was the study population clearly specified and defined?              | Did the authors describe the group of people from which the study participants were selected or recruited, using demographics, location, and time period? If fewer than 50%                                                                                        |

|                                                                                                                                                                                                                                         |                                                                                                                                                                                                                                                                                                                                                                                                                                                               |
|-----------------------------------------------------------------------------------------------------------------------------------------------------------------------------------------------------------------------------------------|---------------------------------------------------------------------------------------------------------------------------------------------------------------------------------------------------------------------------------------------------------------------------------------------------------------------------------------------------------------------------------------------------------------------------------------------------------------|
| Was the participation rate of eligible persons at least 50%?                                                                                                                                                                            | of eligible persons participated in the study, then there is concern that the study population does not adequately represent the target population. This increases the risk of bias.                                                                                                                                                                                                                                                                          |
| Were all the subjects selected or recruited from the same or similar populations (including the same time period)? Were inclusion and exclusion criteria for being in the study prespecified and applied uniformly to all participants? | Were the inclusion and exclusion criteria developed prior to recruitment or selection of the study population? Were the same underlying criteria used for all of the subjects involved? This issue is related to the description of the study population, above, and you may find the information for both of these questions in the same section of the paper. If the study recruits groups from different clinic populations, then it will be a "no."       |
| Was a sample size justification, power description, or variance and effect estimates provided?                                                                                                                                          | Did the authors present their reasons for selecting or recruiting the number of people included or analysed? Do they note or discuss the statistical power of the study? This question is about whether or not the study had enough participants to detect an association if one truly existed.                                                                                                                                                               |
| For the analyses in this paper, were the exposure(s) of interest measured prior to the outcome(s) being measured?                                                                                                                       | This question is important because, in order to determine whether an exposure causes an outcome, the exposure must come before the outcome. For some prospective cohort studies, the investigator enrolls the cohort and then determines the exposure status of various members of the cohort. Cross-sectional studies are conducted, where the exposures and outcomes are measured during the same timeframe hence, the answer to Question 6 should be "no." |
| Was the timeframe sufficient so that one could reasonably expect to see an association between exposure and outcome if it existed?                                                                                                      | Did the study allow enough time for a sufficient number of outcomes to occur or be observed, or enough time for an exposure to have a biological effect on an outcome? Cross-sectional analyses allow no time to see an effect, since the exposures and outcomes are assessed at the same time, so those would get a "no" response.                                                                                                                           |

|                                                                                                                                                                                                               |                                                                                                                                                                                                                                                                                                                                                                                                                |
|---------------------------------------------------------------------------------------------------------------------------------------------------------------------------------------------------------------|----------------------------------------------------------------------------------------------------------------------------------------------------------------------------------------------------------------------------------------------------------------------------------------------------------------------------------------------------------------------------------------------------------------|
| For exposures that can vary in amount or level, did the study examine different levels of the exposure as related to the outcome (e.g., categories of exposure, or exposure measured as continuous variable)? | If the exposure can be defined as a range (examples: drug dosage, amount of physical activity, amount of sodium consumed), were multiple categories of that exposure assessed? If there are only two possible exposures (yes/no), then this question should be given an "NA," and it should not count negatively towards the quality rating.                                                                   |
| Were the exposure measures (independent variables) clearly defined, valid, reliable, and implemented consistently across all study participants?                                                              | Were the exposure measures defined in detail? Were the tools or methods used to measure exposure accurate and reliable. When exposures are measured with less accuracy or validity, it is harder to see an association between exposure and outcome even if one exists. Also as important is whether the exposures were assessed in the same manner within groups and between groups; if not, bias may result. |
| Was the exposure(s) assessed more than once over time?                                                                                                                                                        | Was the exposure for each person measured more than once during the course of the study period? Multiple measurements with the same result increase our confidence that the exposure status was correctly classified. Also, multiple measurements enable investigators to look at changes in exposure over time.                                                                                               |
| Were the outcome measures (dependent variables) clearly defined, valid, reliable, and implemented consistently across all study participants?                                                                 | Were the outcomes defined in detail? Were the tools or methods for measuring outcomes accurate and reliable—for example, have they been validated or are they objective? This issue is important because it influences confidence in the validity of study results. Also important is whether the outcomes were assessed in the same manner within groups and between groups.                                  |
| Were the outcome assessors blinded to the exposure status of participants?                                                                                                                                    | Blinding means that outcome assessors did not know whether the participant was exposed or unexposed. It is also sometimes called "masking." Sometimes the person measuring the exposure is the same person conducting the outcome assessment. In this case, the outcome assessor                                                                                                                               |



|                                                                                                                                                       |                                                                                                                                                                                                                                                                                                                                                                                                                                                                                                                                                                                                                                                          |
|-------------------------------------------------------------------------------------------------------------------------------------------------------|----------------------------------------------------------------------------------------------------------------------------------------------------------------------------------------------------------------------------------------------------------------------------------------------------------------------------------------------------------------------------------------------------------------------------------------------------------------------------------------------------------------------------------------------------------------------------------------------------------------------------------------------------------|
|                                                                                                                                                       | would most likely not be blinded to exposure status because they also took measurements of exposures. If so, make a note of that in the comments section. Think about whether it is likely that the person(s) doing the outcome assessment would know (or be able to figure out) the exposure status of the study participants.                                                                                                                                                                                                                                                                                                                          |
| Was loss to follow-up after baseline 20% or less?                                                                                                     | Higher overall follow-up rates are always better than lower follow-up rates, even though higher rates are expected in shorter studies, whereas lower overall follow-up rates are often seen in studies of longer duration. Usually, an acceptable overall follow-up rate is considered 80 percent or more of participants whose exposures were measured at baseline.                                                                                                                                                                                                                                                                                     |
| Were key potential confounding variables measured and adjusted statistically for their impact on the relationship between exposure(s) and outcome(s)? | Were key potential confounding variables measured and adjusted for, such as by statistical adjustment for baseline differences? Logistic regression or other regression methods are often used to account for the influence of variables not of interest. This is a key issue in cohort studies, because statistical analyses need to control for potential confounders, in contrast to an RCT, where the randomization process controls for potential confounders. All key factors that may be associated both with the exposure of interest and the outcome—that are not of interest to the research question—should be controlled for in the analyses |

**Supplementary file 4: Framework for Supporting the Use of Research Evidence (SURE) for identifying the implementation challenges facing studies that evaluate mRDTs' impact on patient-important outcomes**

| Level                     | Barriers and enablers                                                        | Description                                                                                                                                                                                                                                                                                                                                                 |
|---------------------------|------------------------------------------------------------------------------|-------------------------------------------------------------------------------------------------------------------------------------------------------------------------------------------------------------------------------------------------------------------------------------------------------------------------------------------------------------|
| <b>Recipients of care</b> | Knowledge and skills                                                         | Recipients of care may have varying degrees of knowledge about the healthcare issue or the intervention, or may not have the skills to apply this knowledge. E.g. People may be unaware that family planning services are available at their local clinic or may not have the skills to prepare oral rehydration therapy when its use has been recommended. |
|                           | Attitudes regarding programme acceptability, appropriateness and credibility | Recipients of care may have opinions about the healthcare issue and the intervention, including views about the acceptability and appropriateness of the intervention and the credibility of the provider and the healthcare system. E.g. People may not agree with the choice of intervention or may not trust the reasons behind it                       |
|                           | Motivation to change or adopt new behaviour                                  | Recipients of care may have varying degrees of motivation to change behaviour or adopt new behaviours. E.g. they may be more or less motivated to seek care                                                                                                                                                                                                 |
| <b>Providers of care</b>  | Knowledge and skills                                                         | Providers may have varying degrees of knowledge about the healthcare issue or the intervention, or may not have the skills to apply this knowledge. E.g. health workers may be unaware of guidelines on tuberculosis treatment or may not have received training in the implementation of these guidelines                                                  |
|                           | Attitudes regarding programme acceptability,                                 | Providers may have opinions about the healthcare issue and the intervention, including views about the acceptability and appropriateness of the intervention and the credibility of the provider and the                                                                                                                                                    |

|                                                                                                                                                                                 |                                                                              |                                                                                                                                                                                                                                                                                                                                                   |
|---------------------------------------------------------------------------------------------------------------------------------------------------------------------------------|------------------------------------------------------------------------------|---------------------------------------------------------------------------------------------------------------------------------------------------------------------------------------------------------------------------------------------------------------------------------------------------------------------------------------------------|
|                                                                                                                                                                                 | appropriateness and credibility                                              | healthcare system. E.g. health workers may not agree with the choice of intervention or may not trust the reasons behind it                                                                                                                                                                                                                       |
|                                                                                                                                                                                 | Motivation to change or adopt new behaviour                                  | Providers may have varying degrees of motivation to change behaviour or adopt new behaviours. E.g., they may be more or less motivated to take on new tasks                                                                                                                                                                                       |
| <b>Other stakeholders (including other healthcare providers, community health committees, community leaders, programme managers, donors, policy makers and opinion leaders)</b> | Knowledge and skills                                                         | Other stakeholders may have varying degrees of knowledge about the healthcare issue or the intervention, or may not have the skills to apply this knowledge. E.g. a community leader may have insufficient knowledge of the benefits of exclusive breastfeeding or may not feel skilled in running community meetings to promote infant care      |
|                                                                                                                                                                                 | Attitudes regarding programme acceptability, appropriateness and credibility | Other stakeholders' may have opinions about the healthcare issue or the intervention, including views about the acceptability and appropriateness of the intervention and the credibility of the provider and the healthcare system. E.g. stakeholders may not agree with the choice of intervention because of competing interests or priorities |
|                                                                                                                                                                                 | Motivation to change or adopt new behaviour                                  | Other stakeholders may have varying degrees of motivation to change behaviour or adopt new behaviours. E.g. programme managers may not be motivated to deliver supervision to remote clinics                                                                                                                                                      |
| <b>Health system constraints</b>                                                                                                                                                | Accessibility of care                                                        | The accessibility of healthcare facilities may affect implementation of the option, for instance because of financial (user fees), geographic (distance to clinic), or social (access for certain ethnic groups) factors                                                                                                                          |
|                                                                                                                                                                                 | Financial resources                                                          | Additional financial resources may be needed to implement the option                                                                                                                                                                                                                                                                              |

|  |                              |                                                                                                                                                                |
|--|------------------------------|----------------------------------------------------------------------------------------------------------------------------------------------------------------|
|  | Human resources              | An increased supply or distribution of health workers may be needed to implement the option                                                                    |
|  | Educational system           | The educational system for health workers may need to be modified                                                                                              |
|  | Clinical supervision         | Health workers may require more supervision than is currently provided to implement the option                                                                 |
|  | Internal communication       | Changes in communication between different levels of the health system or between the health and social care systems may be needed to implement the option     |
|  | External communication       | Changes in communication between health workers and recipients of care needs may be needed to implement the option                                             |
|  | Allocation of authority      | Changes may be needed regarding the levels or individuals that have the authority to make decisions                                                            |
|  | Accountability               | Changes may be needed so that those with the authority to make decisions are accountable for the decisions they make                                           |
|  | Management and or leadership | Adequately trained managers or sufficient leadership may be needed to implement the option                                                                     |
|  | Information systems          | Adequate information systems to assess and monitor needs, resource use, and utilisation of targeted services may be needed to implement the option             |
|  | Facilities                   | Adequate supply and distribution of necessary supplies and equipment to facilities, and maintenance of these facilities, may be needed to implement the option |
|  | Patient flow processes       | Adequate processes for outreach and receiving, referring and transferring                                                                                      |

|                                         |                                       |                                                                                                                                                                                                                                                    |
|-----------------------------------------|---------------------------------------|----------------------------------------------------------------------------------------------------------------------------------------------------------------------------------------------------------------------------------------------------|
|                                         |                                       | patients may be needed to implement the option                                                                                                                                                                                                     |
|                                         | Procurement and distribution systems  | Adequate systems for procuring and distributing drugs and other supplies may be needed to implement the option                                                                                                                                     |
|                                         | Incentives                            | Reimbursement systems for patients, health workers or others may need to be structured to facilitate rather than hinder implementation of the option                                                                                               |
|                                         | Bureaucracy                           | Paperwork and procedures may need to be structured to facilitate rather than hinder implementation of the option                                                                                                                                   |
|                                         | Relationship with norms and standards | Current norms and standards of practice need to be in line with the relevant option                                                                                                                                                                |
| <b>Social and political constraints</b> | Ideology                              | Ideological beliefs (e.g. in ‘free markets’) may affect implementation of the option                                                                                                                                                               |
|                                         | Short-term thinking                   | Implementation of the option may be opposed if its benefits are likely to occur beyond the time horizon of decision makers (e.g. after the next election)                                                                                          |
|                                         | Contracts                             | Contracts with service providers or enforcement of contracts may not be adequate to ensure implementation of the option or the types of effective care at which it is targeted                                                                     |
|                                         | Legislation or regulations            | Changes to legislation or regulations, including those that are general (e.g. regulating government contracts, regulating working conditions) and those that are specific to the health system (e.g. licensing health professionals) may be needed |
|                                         | Donor policies                        | Donor policies and programmes may influence implementation                                                                                                                                                                                         |
|                                         | Influential people                    | The opinions of influential people may influence the option or the types of effective care at which it is targeted                                                                                                                                 |

|  |                     |                                                                             |
|--|---------------------|-----------------------------------------------------------------------------|
|  | Corruption          | Corrupt behaviour by decision makers or others may influence implementation |
|  | Political stability | Political instability may influence implementation                          |

**Supplementary file 5: Characteristics of Studies Excluded from our Review**

| <b>Study ID</b>        | <b>Reason for exclusion</b> |
|------------------------|-----------------------------|
| Agaba 2015 (1)         | Conference abstract         |
| Agwu 2012 (2)          | Conference abstract         |
| Ansah 2011 (3)         | Conference abstract         |
| Audu 2016 (4)          | Wrong intervention          |
| Azikiwe 2012 (5)       | Wrong patient population    |
| Baiden 2012 (6)        | Wrong study design          |
| Baltzell 2019 (7)      | Wrong comparator            |
| Bisoffi 2011 (8)       | Wrong study design          |
| Boadu 2012 (9)         | Conference abstract         |
| Bottieu 2013 (10)      | Wrong intervention          |
| Boyce 2015 (11)        | Wrong patient population    |
| Boyce 2017 (12)        | Wrong study design          |
| Brasseur 2012 (13)     | Conference abstract         |
| Brigitte 2020 (14)     | Conference abstract         |
| Bruxvoort 2011 (15)    | Conference abstract         |
| Bruxvoort 2015 (16)    | Conference abstract         |
| Bruxvoort 2017 (17)    | Wrong study design          |
| Burchet 2017 (18)      | Wrong study design          |
| Catherine 2012 (19)    | Conference abstract         |
| Chanda 2009 (20)       | Wrong outcomes              |
| Chandler 2017 (21)     | Wrong intervention          |
| Chilongola 2015 (22)   | Wrong intervention          |
| Chinkhumba 2010 (23)   | Wrong outcomes              |
| Chukwu 2017 (24)       | Conference abstract         |
| Cohen 2015 (25)        | Conference abstract         |
| D'Acremont 2011 (26)   | Wrong comparator            |
| D'Acremont 2010 (27)   | Wrong comparator            |
| Das 2015 (28)          | Conference abstract         |
| De Carsalade 2009 (29) | Not in English              |
| Eliades 2017 (30)      | Conference abstract         |

|                       |                          |
|-----------------------|--------------------------|
| Engo 2019 (31)        | Conference abstract      |
| Festo 2012 (32)       | Conference abstract      |
| Gerstl 2010 (33)      | Wrong outcomes           |
| Githinji 2018 (34)    | Conference abstract      |
| Gitonga 2012 (35)     | Wrong outcomes           |
| Gupta 2017 (36)       | Wrong setting            |
| Halliday 2014 (37)    | Conference abstract      |
| Halliday 2014 (38)    | Wrong patient population |
| Hamer 2012 (39)       | Wrong comparator         |
| Hamer 2007 (40)       | Wrong outcomes           |
| Harchut 2013 (41)     | Wrong outcomes           |
| Harutyunyan 2010 (42) | Conference abstract      |
| Herlihy 2016 (43)     | Wrong article type       |
| Hopkins 2017 (44)     | Wrong study design       |
| Houze 2009 (45)       | Wrong patient population |
| Hsiang 2019 (46)      | Wrong outcomes           |
| Huth 2021 (47)        | Wrong patient population |
| Ige 2014 (48)         | Conference abstract      |
| Ishengoma 2015 (49)   | Conference abstract      |
| Kalolella 2012 (50)   | Conference abstract      |
| Kamau 2020 (51)       | Wrong intervention       |
| Kapisi 2017 (52)      | Conference abstract      |
| Kariuki 2018 (53)     | Conference abstract      |
| Kiemde 2017 (54)      | Conference abstract      |
| Kipanga 2014 (55)     | Wrong patient population |
| Kitutu 2017 (56)      | Wrong intervention       |
| Kochar 2010 (57)      | Wrong outcomes           |
| Kukula 2012 (58)      | Conference abstract      |
| Kumar 2011 (59)       | Conference abstract      |
| Lal 2016 (60)         | Wrong outcomes           |
| Lal 2015 (61)         | Conference abstract      |
| Lawrence 2014 (62)    | Conference abstract      |



|                          |                          |
|--------------------------|--------------------------|
| Leurent 2014 (63)        | Conference abstract      |
| Masanja 2012 (64)        | Wrong patient population |
| Mawili-Mboumba 2010 (65) | Wrong study design       |
| Matangila 2014 (66)      | Conference abstract      |
| Mbonye 2020 (67)         | Wrong intervention       |
| Mbonye 2014 (68)         | Wrong intervention       |
| Mbonye 2015 (69)         | Conference abstract      |
| Mbonye 2013 (70)         | Conference abstract      |
| Mbonye 2013 (71)         | Conference abstract      |
| Mfuh 2015 (72)           | Conference abstract      |
| Mosha 2010 (73)          | Wrong comparator         |
| Mubi 2013 (74)           | Wrong patient population |
| Munier 2009 (75)         | Not in English           |
| Ndyomugyenye 2012 (76)   | Conference abstract      |
| Ndyomugyenye 2013 (77)   | Conference abstract      |
| Ndyomugyenye 2013 (78)   | Conference abstract      |
| Ndyomugyenye 2014 (79)   | Conference abstract      |
| Newman 2009 (80)         | Conference abstract      |
| Njau 2013 (81)           | Conference abstract      |
| Ojo 2020 (82)            | Conference abstract      |
| Okolo 2020 (83)          | Conference abstract      |
| Osei-Kwakye 2013 (84)    | Wrong outcomes           |
| Otshudiema 2013 (85)     | Conference abstract      |
| Oyeyemi 2015 (86)        | Wrong outcomes           |
| Parikh 2010 (87)         | Wrong patient population |
| Pinto 1999 (88)          | Wrong setting            |
| Portugal 2017 (89)       | Wrong patient population |
| Rantala 2010 (90)        | Wrong outcomes           |
| Reyburn 2004 (91)        | Wrong patient population |
| Ruizendaal 2017 (92)     | Conference abstract      |
| Salomao 2015 (93)        | Wrong comparator         |
| Sangoro 2014 (94)        | Wrong outcomes           |

|                            |                          |
|----------------------------|--------------------------|
| Schrot-Sanyan 2013 (95)    | Wrong patient population |
| Searle 2017 (96)           | Conference abstract      |
| Shakely 2013 (97)          | Wrong comparator         |
| Srinivasan 2000 (98)       | Wrong setting            |
| Swarthout 2007 (99)        | Wrong outcomes           |
| Tiruneh 2018 (100)         | Wrong patient population |
| Uzochukwu 2009 (101)       | Wrong patient population |
| VanEjik 2019 (102)         | Conference abstract      |
| Wang 2020 (103)            | Conference abstract      |
| Wernsdorfer 2009 (104)     | Conference abstract      |
| Williams 2008 (105)        | Wrong outcomes           |
| Wiseman 2014 (106)         | Conference abstract      |
| Wogu 2018 (107)            | Wrong outcomes           |
| Wongsrichanalai 2007 (108) | Conference abstract      |
| Yimam 2022 (109)           | Wrong study design       |
| Zuninga 2015 (110)         | Wrong setting            |

1. Agaba BB, Ojaku A, Streat E, Nuwa A, Okui P, Adibaku S, et al. Field-based quality monitoring of malaria rapid diagnostic tests in resource-limited settings: Experience from Uganda. *American journal of tropical medicine and hygiene*. 2015;93 (4 Supplement):73.
2. Agwu E, Kyarimpa M, Gulemye I. Abuse of antimalarial drugs in treatment of febrile patients with clinically diagnosed malaria in Bushenyi District, Uganda. *Clinical Microbiology and Infection*. 2012;18:55.
3. Ansah EK, Whitty CJ, Yeung S, Hansen K. Cost-effectiveness analysis of introducing rapid diagnostic tests (RDTs) for malaria diagnosis in public health centers where microscopy is available and peripheral clinics where only clinical diagnosis is available: The case of Ghana. *American journal of tropical medicine and hygiene*. 2011;1:350.
4. Audu R, Anto BP, Koffuor GA, Abruquah AA, Buabeng KO. Malaria rapid diagnostic test evaluation at private retail pharmacies in Kumasi, Ghana. *J Res Pharm Pract*. 2016;5(3):175-80.
5. Azikiwe CC, Ifezulike CC, Siminialayi IM, Amazu LU, Enye JC, Nwawkwunite OE. A comparative laboratory diagnosis of malaria: microscopy versus rapid diagnostic test kits. *Asian Pac J Trop Biomed*. 2012;2(4):307-10.
6. Baiden F, Webster J, Tivura M, Delimini R, Berko Y, Amenga-Etego S, et al. Accuracy of rapid tests for malaria and treatment outcomes for malaria and non-malaria cases among under-five children in rural Ghana. *PLoS One*. 2012;7(4):e34073.
7. Baltzell K, Kortz TB, Scarr E, Blair A, Mguntha A, Bandawe G, et al. 'Not all fevers are malaria': a mixed methods study of non-malarial fever management in rural southern Malawi. *Rural and remote health*. 2019;19(2):4818.

8. Bisoffi Z, Sirima SB, Meheus F, Lodesani C, Gobbi F, Angheben A, et al. Strict adherence to malaria rapid test results might lead to a neglect of other dangerous diseases: a cost benefit analysis from Burkina Faso. *Malar J*. 2011;10:226.
9. Boadu NYA, Ansong D, Amuasi JH, Nguah SB, Arhin B, Somuah S, et al. A review of malaria rapid diagnostic tests (RDT) guideline implementation in a district hospital in Ghana: Has rapid testing been prioritized? *American journal of tropical medicine and hygiene*. 2012;1):397.
10. Bottieau E, Gillet P, De Weggheleire A, Scheirlinck A, Stokx J, Das Dores Mosse C, et al. Treatment practices in patients with suspected malaria in Provincial Hospital of Tete, Mozambique. *Trans R Soc Trop Med Hyg*. 2013;107(3):176-82.
11. Boyce RM, Muir R, Reyes R, Ntaro M, Mulogo E, Matte M, et al. Impact of rapid diagnostic tests for the diagnosis and treatment of malaria at a peripheral health facility in Western Uganda: an interrupted time series analysis. *Malar J*. 2015;14:203.
12. Boyce MR, O'Meara WP. Use of malaria RDTs in various health contexts across sub-Saharan Africa: a systematic review. *BMC Public Health*. 2017;17(1):470.
13. Brasseur P, Badiane M, Cisse M, Vaillant M, Olliaro PL. Changes in malaria prevalence and health provider's behavior towards fever with the introduction of act and RDT at peripheral health centre level in southwestern Senegal (2000-2011). *American journal of tropical medicine and hygiene*. 2012;1):273.
14. Brigitte L. Interests in biological confirmation of malaria diagnosis in decision making for malaria treatment in the Democratic Republic of the Congo. *American Journal of Tropical Medicine and Hygiene*. 2020;103(5 SUPPL):162.
15. Bruxvoort K, Festo C, Thwing J, Thomson R, Kalolella A, Nchimbi H, et al. Over and under-use of artemisinin based combination therapy at public health facilities in three regions of Tanzania. *American journal of tropical medicine and hygiene*. 2011;1):194-5.
16. Bruxvoort K, Leurent B, Hopkins H. Impact of malaria rapid diagnostic tests on patient care: Results from the ACT Consortium. *American journal of tropical medicine and hygiene*. 2015;93 (4 Supplement):464-5.
17. Bruxvoort KJ, Leurent B, Chandler CIR, Ansah EK, Baiden F, Bjorkman A, et al. The Impact of Introducing Malaria Rapid Diagnostic Tests on Fever Case Management: A Synthesis of Ten Studies from the ACT Consortium. *Am J Trop Med Hyg*. 2017;97(4):1170-9.
18. Burchett HE, Leurent B, Baiden F, Baltzell K, Bjorkman A, Bruxvoort K, et al. Improving prescribing practices with rapid diagnostic tests (RDTs): synthesis of 10 studies to explore reasons for variation in malaria RDT uptake and adherence. *BMJ Open*. 2017;7(3):e012973.
19. Catherine MS, DiLiberto D, Chandler C, Webb E, Othieno L, Nankya F, et al. Evaluating the impact of enhanced health facility-based care for malaria and febrile illnesses in children in Uganda: The ACT Prime study. *American journal of tropical medicine and hygiene*. 2012;1):165.
20. Chanda P, Castillo-Riquelme M, Masiye F. Cost-effectiveness analysis of the available strategies for diagnosing malaria in outpatient clinics in Zambia. *Cost Eff Resour Alloc*. 2009;7:5.
21. Chandler CI, Webb EL, Maiteki-Sebuguzi C, Nayiga S, Nabirye C, DiLiberto DD, et al. The impact of an intervention to introduce malaria rapid diagnostic tests on fever case management in a high transmission setting in Uganda: A mixed-methods cluster-randomized trial (PRIME). *PLoS One*. 2017;12(3):e0170998.
22. Chilongola J, Msoka E, Juma A, Kajeguka DC, Semuwa H, Kituma E, et al. Antibiotics prescription practices for provisional malaria cases in three hospitals in Moshi, Northern Tanzania. *Tanzania Journal of Health Research*. 2015;17(3):10.
23. Chinkhumba J, Skarbinski J, Chilima B, Campbell C, Ewing V, San Joaquin M, et al. Comparative field performance and adherence to test results of four malaria rapid diagnostic tests among febrile patients more than five years of age in Blantyre, Malawi. *Malar J*. 2010;9:209.
24. Chukwu LC, Agbasi PU, Unekwe PC, Onyema PU. Pattern of parasitological response and symptoms clearance in patients treated with artemether-lumefantrine combination in the treatment

of uncomplicated malaria in elele, a malaria endemic area in rivers state Nigeria. FASEB Journal Conference: Experimental Biology. 2017;31(1 Supplement 1).

25. Cohen JL, Saran I. Diagnostic testing and adherence to antimalarial medication: evidence from a randomized controlled trial in Uganda 2015; (4 Supplement):[463-4 pp.]. Available from: <http://onlinelibrary.wiley.com/doi/10.1111/1365-3113.12498>.
26. D'Acremont V, Kahama-Maró J, Swai N, Mtasiwa D, Genton B, Lengeler C. Reduction of anti-malarial consumption after rapid diagnostic tests implementation in Dar es Salaam: a before-after and cluster randomized controlled study. *Malar J*. 2011;10:107.
27. d'Acremont V, Malila A, Swai N, Tillya R, Kahama-Maró J, Lengeler C, et al. Withholding antimalarials in febrile children who have a negative result for a rapid diagnostic test. *Clin Infect Dis*. 2010;51(5):506-11.
28. Das S, Jang IK, Misiuda KI, La Barre P. Evaluation of next generation infection detection tests for malaria elimination and eradication. *American journal of tropical medicine and hygiene*. 2015;93 (4 Supplement):254.
29. de Carsalade GY, Lam Kam R, Lepere JF, de Brettes A, Peyramond D. [Can the thick drop/smear examination for malaria be replaced by a rapid diagnostic test in first intention? The Mayotte experience]. *Med Mal Infect*. 2009;39(1):36-40.
30. Eliades J, Martin T, Davis K, Wun J, Mkomwa Z, Guindo B, et al. Improving health care worker performance in adherence to testing and test results for malaria in eight sub-saharan African countries. *American Journal of Tropical Medicine and Hygiene*. 2017;97 (5 Supplement 1):291-2.
31. Engo AB, Ntamabyaliro N, Nzolo DB, Lula YN, Tona GL. Drug use in the management of severe malaria in public health facilities in Democratic Republic of Congo. *American Journal of Tropical Medicine and Hygiene*. 2019;101(5 Supplement):80.
32. Festo C, Thomson R, Bruxvoort K, Johanes B, Nchimbi H, Kalolella A, et al. Access and targeting of malaria treatment: Assessing policy impact of the affordable medicines facility-malaria and roll out of parasitological diagnosis in three regions of tanzania. *American journal of tropical medicine and hygiene*. 2012;1):4.
33. Gerstl S, Dunkley S, Mukhtar A, De Smet M, Baker S, Maikere J. Assessment of two malaria rapid diagnostic tests in children under five years of age, with follow-up of false-positive pLDH test results, in a hyperendemic falciparum malaria area, Sierra Leone. *Malar J*. 2010;9:28.
34. Githinji SW, Oyando R, Malinga J, Ejersa W, Amin A, Ye Y. Changes in confirmed and clinical malaria cases reported through the DHIS 2 software platform in Kenya, 2011-2015. *American Journal of Tropical Medicine and Hygiene*. 2018;99 (4 Supplement):344.
35. Gitonga CW, Kihara JH, Njenga SM, Awuondo K, Noor AM, Snow RW, et al. Use of rapid diagnostic tests in malaria school surveys in Kenya: does their under-performance matter for planning malaria control? *Am J Trop Med Hyg*. 2012;87(6):1004-11.
36. Gupta P, Narang M, Gomber S, Saha R. Effect of quinine and artesunate combination therapy on platelet count of children with severe malaria. *Paediatr Int Child Health*. 2017;37(2):139-43.
37. Halliday KE, Mathanga D, Witek-McManus S, Mtali A, Ali D, Sande J, et al. Impact of school-based program of malaria diagnosis and treatment on school attendance in southern Malawi. *American journal of tropical medicine and hygiene*. 2014;1):381.
38. Halliday KE, Okello G, Turner EL, Njagi K, McHaro C, Kengo J, et al. Impact of intermittent screening and treatment for malaria among school children in Kenya: a cluster randomised trial. *PLoS Med*. 2014;11(1):e1001594.
39. Hamer DH, Brooks ET, Semrau K, Pilingana P, MacLeod WB, Siazeele K, et al. Quality and safety of integrated community case management of malaria using rapid diagnostic tests and pneumonia by community health workers. *Pathog Glob Health*. 2012;106(1):32-9.
40. Hamer DH, Ndhlovu M, Zurovac D, Fox M, Yeboah-Antwi K, Chanda P, et al. Improved diagnostic testing and malaria treatment practices in Zambia. *JAMA*. 2007;297(20):2227-31.

41. Harchut K, Standley C, Dobson A, Klaassen B, Rambaud-Althaus C, Althaus F, et al. Over-diagnosis of malaria by microscopy in the Kilombero Valley, Southern Tanzania: an evaluation of the utility and cost-effectiveness of rapid diagnostic tests. *Malar J.* 2013;12:159.
42. Harutyunyan V. Quality assurance of malaria rapid diagnostic tests (RDT) and its implication for clinical management of malaria. *American journal of tropical medicine and hygiene.* 2010;1:284.
43. Herlihy JM, D'Acremont V, Hay Burgess DC, Hamer DH. *Diagnosis and Treatment of the Febrile Child.* Washington DC: 2016 International Bank for Reconstruction and Development / The World Bank.; 2016.
44. Hopkins H, Bruxvoort KJ, Cairns ME, Chandler CI, Leurent B, Ansah EK, et al. Impact of introduction of rapid diagnostic tests for malaria on antibiotic prescribing: analysis of observational and randomised studies in public and private healthcare settings. *BMJ.* 2017;356:j1054.
45. Houze S, Boly MD, Le Bras J, Deloron P, Faucher JF. PfHRP2 and PfLDH antigen detection for monitoring the efficacy of artemisinin-based combination therapy (ACT) in the treatment of uncomplicated falciparum malaria. *Malar J.* 2009;8:211.
46. Hsiang MS, Ntshalintshali N, Kang Dufour MS, Dlamini N, Nhlabathi N, Vilakati S, et al. Active case-finding for malaria: A three-year national evaluation of optimal approaches to detect infections and hotspots through reactive case detection in the low transmission setting of Eswatini. *Clinical infectious diseases : an official publication of the Infectious Diseases Society of America.* 2019.
47. Huth PFB, Addo M, Daniel T, Groendahl B, Hokororo A, Koliopoulos P, et al. Extensive Antibiotic and Antimalarial Prescription Rate among Children with Acute Febrile Diseases in the Lake Victoria Region, Tanzania. *Journal of tropical pediatrics.* 2021;67(1).
48. Ige OK, Oladokun R. Challenges of malaria diagnosis in pediatric patients at a Nigerian hospital. *American journal of tropical medicine and hygiene.* 2014;1:78.
49. Ishengoma DS, Shayo A, Mandara C, Baraka V, Madebe R, Ngatunga D, et al. Performance of malaria rapid diagnostic tests for screening of patients to be enrolled in clinical trials and related studies. *American journal of tropical medicine and hygiene.* 2015;93 (4 Supplement):551.
50. Kalolella AB, Bruxvoort K, Thomson R, Festo C, Nchimbi H, Cairns M, et al. Addressing over- and under-diagnosis of malaria in Tanzania: An evaluation of large-scale implementation of malaria rapid diagnostic tests (MRDTS) in three regions with varying malaria epidemiology. *American journal of tropical medicine and hygiene.* 2012;1:100.
51. Kamau A, Mtanje G, Mataza C, Mwambingu G, Mturi N, Mohammed S, et al. Malaria infection, disease and mortality among children and adults on the coast of Kenya. *Malaria journal.* 2020;19(1):210.
52. Kapisi JA, Sserwanga A, Kigozi R, Opigo J, Yeka A, Kamya MR, et al. Antimalarial prescription practices at 21 public outpatient facilities located in regions of varying malaria endemicity in Uganda. *American Journal of Tropical Medicine and Hygiene.* 2017;97 (5 Supplement 1):528.
53. Kariuki S, Westercamp N, Owidhi M, Otieno K, Chebore W, Desai M, et al. Duration of malaria rapid diagnostic test (RDT) positivity following definitive antimalarial treatment among children in western Kenya. *American journal of tropical medicine and hygiene.* 2018;99(4):91-2.
54. Kiemde F, Mens P, Bonko A, Tahita M, Lompo P, Tinto H, et al. Impact of a malaria rapid diagnostic test detecting plasmodium falciparum-specific histidine-rich protein-2 (RDT-PFHRP2) on the management of febrile children under-5 years of age in a high seasonal malaria transmission area. *American Journal of Tropical Medicine and Hygiene.* 2017;97 (5 Supplement 1):405.
55. Kipanga PN, Omondi D, Mireji PO, Sawa P, Masiga DK, Villinger J. High-resolution melting analysis reveals low Plasmodium parasitaemia infections among microscopically negative febrile patients in western Kenya. *Malar J.* 2014;13:429.
56. Kitutu FE, Kalyango JN, Mayora C, Selling KE, Peterson S, Wamani H. Integrated community case management by drug sellers influences appropriate treatment of paediatric febrile illness in South Western Uganda: a quasi-experimental study. *Malaria journal.* 2017;16(1):425.

57. Kochar DK, Gupta V, Kochar A, Acharya J, Middha S, Sirohi P, et al. Comparison of quinine and rabepazole with quinine monotherapy in the treatment of uncomplicated falciparum malaria. *J Vector Borne Dis*. 2010;47(3):140-4.
58. Kukula VA. Prescription practices among public and private health facilities for uncomplicated malaria in rural Ghana. *American journal of tropical medicine and hygiene*. 2012;1):94.
59. Kumar JA, Kalule J, Elguero C, Dufort E, Tobin E. Correlation of malaria rapid diagnostic testing with clinical-based algorithm in a rural village in Uganda. *American journal of tropical medicine and hygiene*. 2011;1):395.
60. Lal S, Ndyomugenyi R, Magnussen P, Hansen KS, Alexander ND, Paintain L, et al. Referral Patterns of Community Health Workers Diagnosing and Treating Malaria: Cluster-Randomized Trials in Two Areas of High- and Low-Malaria Transmission in Southwestern Uganda. *Am J Trop Med Hyg*. 2016;95(6):1398-408.
61. Lal S, Ndyomugenyi R, Hansen KS, Magnussen P, Clarke SE. Referral from community health workers: evidence from cluster randomized trials of mRDTs in two areas of high and low malaria transmission in Uganda 2015; (4 Supplement):[360 p.]. Available from: <http://onlinelibrary.wiley.com/doi/10.1002/1471-2575.tbm2016040400004>.
62. Lawrence JJ, Ajayi T, Yeboah-Antwi K, MacLeod WB, Biemba G, Lunze K, et al. Clinical assessment of children with febrile illness at health facilities in three districts in Southern Zambia. *American journal of tropical medicine and hygiene*. 2014;1):192.
63. Leurent B, Bruxvoort K, Grieve E, Hutchinson E, Reynolds J, Leslie T. Impact of malaria rapid diagnostic tests on care of febrile patients: Cross-project results from the ACT Consortium. *American journal of tropical medicine and hygiene*. 2014;1):552.
64. Masanja IM, Selemani M, Amuri B, Kajungu D, Khatib R, Kachur SP, et al. Increased use of malaria rapid diagnostic tests improves targeting of anti-malarial treatment in rural Tanzania: implications for nationwide rollout of malaria rapid diagnostic tests. *Malar J*. 2012;11:221.
65. Mawili-Mboumba DP, Bouyou Akotet MK, Ngoungou EB, Kombila M. Evaluation of rapid diagnostic tests for malaria case management in Gabon. *Diagn Microbiol Infect Dis*. 2010;66(2):162-8.
66. Matangila JR, Lutumba P, Van Geertruyden JP. RDT are more cost effective to detect asymptomatic Plasmodium falciparum infection which is associated with anemia in pregnancy, Kinshasa, Democratic Republic of the Congo. *International Journal of Infectious Diseases*. 2014;21:5.
67. Mbonye AK, Buregyeya E, Rutebemberwa E, Lal S, Clarke SE, Hansen KS, et al. Treatment of Sick Children Seeking Care in the Private Health Sector in Uganda: A Cluster Randomized Trial. *The American journal of tropical medicine and hygiene*. 2020;102(3):658-66.
68. Mbonye AK, Magnussen P, Chandler CI, Hansen KS, Lal S, Cundill B, et al. Introducing rapid diagnostic tests for malaria into drug shops in Uganda: design and implementation of a cluster randomized trial. *Trials*. 2014;15:303.
69. Mbonye AK, Magnussen P, Hutchinson E, Hansen KS, Lal S, Clarke SE. Effects of introducing malaria rapid diagnostic tests in drug shops: Findings from the evaluation of a cluster randomised trial in Uganda 2015:[16 p.]. Available from: <http://onlinelibrary.wiley.com/doi/10.1002/1471-2575.tbm2016040400004>.
70. Mbonye AK, Magnussen P, Lal S, Hansen KS, Cundill B, Chandler C, et al. A cluster randomized trial introducing rapid diagnostic tests into registered drug shops in Uganda: Impact on appropriate treatment of malaria. *American journal of tropical medicine and hygiene*. 2013;1):383.
71. Mbonye A, Magnussen P, Lal S, Hansen K, Cundill B, Chandler C, et al. A cluster randomised trial introducing rapid diagnostic tests into the private health sector in Uganda: Impact on appropriate treatment of malaria. *Tropical Medicine and International Health*. 2013;18:74.
72. Mfuh KO, Achonduh-Atijegbe OA, Leke RG, Taylor DW, Nerurkar VR. Flipping the switch to accurately diagnose malaria: A comparison of clinical diagnosis, rapid diagnostic test (RDT),



microscopy and PCR in the diagnosis of malaria in Cameroon. *American journal of tropical medicine and hygiene*. 2015;93 (4 Supplement):550.

73. Moshia JF, Conteh L, Tediosi F, Gesase S, Bruce J, Chandramohan D, et al. Cost implications of improving malaria diagnosis: Findings from North-Eastern Tanzania. *PLoS One*. 2010;5 (1) (no pagination)(e8707).
74. Mubi M, Kakoko D, Ngasala B, Premji Z, Peterson S, Bjorkman A, et al. Malaria diagnosis and treatment practices following introduction of rapid diagnostic tests in Kibaha District, Coast Region, Tanzania. *Malar J*. 2013;12:293.
75. Munier A, Diallo A, Sokhna C, Chippaux JP. [Assessment of a rapid diagnostic test for malaria in rural health care facilities in Senegal]. *Med Trop (Mars)*. 2009;69(5):496-500.
76. Ndyomugenyi R, Hansen KS, Lal S, Chandler C, Mbonye AK, Magnussen P, et al. Introducing rapid diagnostic tests into community-based management of malaria: Evidence from a cluster-randomized trial in two areas of high and low transmission in Uganda. *American journal of tropical medicine and hygiene*. 2012;1:101-2.
77. Ndyomugenyi R, Magnussen P, Lal S, Hansen KS, Chandler C, Clarke SE. Use of malaria rapid diagnostic test results among community medicine distributors in rural Ugandan communities: Impact on appropriate treatment. *American journal of tropical medicine and hygiene*. 2013;1:383.
78. Ndyomugenyi R, Lal S, Hansen K, Chandler C, Magnussen P, Clarke S. Adherence to rapid diagnostic test results among community medicine distributors in rural Ugandan communities. *Tropical Medicine and International Health*. 2013;18:73-4.
79. Ndyomugenyi R, Magnussen P, Hansen KS, Lal S, Chandler CI, Mbonye AK, et al. Improved targeting of antimalarial treatment in community-based management of malaria: Evidence from cluster-randomized trials in Uganda 2014; (5 suppl. 1):[268 p.]. Available from: <http://onlinelibrary.wiley.com/doi/cochrane/central/articles/347/CN-01056347/frame.html>.
80. Newman MS, Rajan L. Are RDTs cost-effective and safe? A systematic review of accuracy in malaria diagnosis. *American journal of tropical medicine and hygiene*. 2009;1:53.
81. Njau JD, Kachur SP, McFarland D. A comparative cost-effective analysis study for adopting universal malaria rapid diagnostic tests (MRDT) in pediatric fevers across three sub-Saharan Africa countries. *American journal of tropical medicine and hygiene*. 2013;1:346.
82. Ojo AA, Maxwell K, Oresanya O, Adaji J, Hamade P, Tibenderana JK, et al. Health systems readiness and quality of inpatient malaria case-management in Kano State, Nigeria. *Malaria journal*. 2020;19(1):384.
83. Okolo CA, Erinle V, Oronsaye F, Temitope A, Ikhimioya U, Ismael Nana G, et al. Outcome of malaria rapid diagnostic test scale up on reducing presumptive diagnosis of malaria in challenging health settings: Evidence from 8 Nigerian States. *American Journal of Tropical Medicine and Hygiene*. 2020;103(5 SUPPL):184.
84. Osei-Kwakye K, Asante KP, Mahama E, Apanga S, Owusu R, Kwara E, et al. The benefits or otherwise of managing malaria cases with or without laboratory diagnosis: the experience in a district hospital in Ghana. *PLoS One*. 2013;8(3):e58107.
85. Otshudiema J, Embeke N, Hernandez F, Tchofa J, Modiri CM, Mwema FX. Scaling-up malaria rapid diagnostic tests and artemisinin-based combination therapy into integrated community case management sites: Results from two remote and low-resource settings in the democratic republic of Congo. *American journal of tropical medicine and hygiene*. 2013;1:382.
86. Oyeyemi OT, Ogunlade AF, Oyewole IO. Comparative assessment of microscopy and rapid diagnostic test (RDT) as malaria diagnostic tools. *Research Journal of Parasitology*. 2015;10(3):120-6.
87. Parikh R, Amole I, Tarpley M, Gbadero D, Davidson M, Vermund SH. Cost comparison of microscopy vs. empiric treatment for malaria in Southwestern Nigeria: a prospective study. *Malar J*. 2010;9:371.
88. Pinto MJ, Pereira NF, Rodrigues S, Kharangate NV, Verenkar MP. Rapid diagnosis of falciparum malaria by detection of Plasmodium falciparum HRP-2 antigen. *J Assoc Physicians India*. 1999;47(11):1076-8.

89. Portugal S, Tran TM, Ongoiba A, Bathily A, Li S, Doumbo S, et al. Treatment of Chronic Asymptomatic *Plasmodium falciparum* Infection Does Not Increase the Risk of Clinical Malaria Upon Reinfection. *Clin Infect Dis*. 2017;64(5):645-53.
90. Rantala AM, Taylor SM, Trotman PA, Luntamo M, Mbewe B, Maleta K, et al. Comparison of real-time PCR and microscopy for malaria parasite detection in Malawian pregnant women. *Malaria journal*. 2010;9 (1) (no pagination)(269).
91. Reyburn H, Mbatia R, Drakeley C, Carneiro I, Mwakasungula E, Mwerinde O, et al. Overdiagnosis of malaria in patients with severe febrile illness in Tanzania: a prospective study. *Bmj*. 2004;329(7476):1212.
92. Ruizendaal E, Schallig H, Traore M, Lompo P, Magloire NH, Traore O, et al. Malaria screening during pregnancy with RDTs performed by community health workers in Nanoro, Burkina Faso. *Tropical medicine & international health*. 2017;22:96-.
93. Salomao CA, Sacarlal J, Chilundo B, Gudo ES. Prescription practices for malaria in Mozambique: poor adherence to the national protocols for malaria treatment in 22 public health facilities. *Malar J*. 2015;14:483.
94. Sangoro O, Turner E, Simfukwe E, Miller JE, Moore SJ. A cluster-randomized controlled trial to assess the effectiveness of using 15% DEET topical repellent with long-lasting insecticidal nets (LLINs) compared to a placebo lotion on malaria transmission. *Malar J*. 2014;13:324.
95. Schrot-Sanyan S, Gaidot-Pagnier S, Abou-Bacar A, Sirima SB, Candolfi E. Malaria relevance and diagnosis in febrile Burkina Faso travellers: a prospective study. *Malar J*. 2013;12:270.
96. Searle KM, Pringle J, Hamapumbu H, Musonda M, Katowa B, Kobayashi T, et al. Evaluating the efficiency of reactive case detection to achieve malaria elimination in rural Southern Zambia using follow-up household visits and parasite genotyping. *American Journal of Tropical Medicine and Hygiene*. 2017;97 (5 Supplement 1):412.
97. Shakely D, Elfving K, Aydin-Schmidt B, Msellem MI, Morris U, Omar R, et al. The usefulness of rapid diagnostic tests in the new context of low malaria transmission in Zanzibar. *PLoS One*. 2013;8(9):e72912.
98. Srinivasan S, Moody AH, Chiodini PL. Comparison of blood-film microscopy, the OptiMAL dipstick, Rhodamine-123 fluorescence staining and PCR, for monitoring antimalarial treatment. *Ann Trop Med Parasitol*. 2000;94(3):227-32.
99. Swarthout TD, Counihan H, Senga RK, van den Broek I. Paracheck-Pf accuracy and recently treated *Plasmodium falciparum* infections: is there a risk of over-diagnosis? *Malar J*. 2007;6:58.
100. Tiruneh M, Gebregergs GB, Birhanu D. Determinants of delay in seeking treatment among malaria patients in Dera district, NorthWest Ethiopia: a case control study. *African health sciences*. 2018;18(3):552-9.
101. Uzochukwu BS, Obikeze EN, Onwujekwe OE, Onoka CA, Griffiths UK. Cost-effectiveness analysis of rapid diagnostic test, microscopy and syndromic approach in the diagnosis of malaria in Nigeria: implications for scaling-up deployment of ACT. *Malar J*. 2009;8:265.
102. Van Eijk AM. Subpatent malaria in pregnancy: A systematic review and individual patient data meta-analysis. *American Journal of Tropical Medicine and Hygiene*. 2019;101(5 Supplement):285-6.
103. Wang X, Zhong D, Otambo W, Atieli H, Yan G. Added value of ultra-sensitive rdt for malaria surveillance in endemic Africa in the context of rapidly changing epidemiology. *American Journal of Tropical Medicine and Hygiene*. 2020;103(5 SUPPL):318-9.
104. Wernsdorfer W. The use of rapid diagnostic tools - The end of traditional microscopic diagnosis of malaria? *Tropical Medicine and International Health*. 2009;14:28.
105. Williams HA, Causer L, Metta E, Malila A, O'Reilly T, Abdulla S, et al. Dispensary level pilot implementation of rapid diagnostic tests: an evaluation of RDT acceptance and usage by providers and patients--Tanzania, 2005. *Malar J*. 2008;7:239.
106. Wiseman V, Mangham-Jefferies L, Achonduh O, Drake T, Cundill B, Onwujekwe O, et al. Economic evaluation of interventions to improve health workers' practice in diagnosing and treating



uncomplicated malaria in Cameroon. *American journal of tropical medicine and hygiene*. 2014;1):268.

107. Wogu MN, Nduka FO. Evaluating Malaria Prevalence Using Clinical Diagnosis Compared with Microscopy and Rapid Diagnostic Tests in a Tertiary Healthcare Facility in Rivers State, Nigeria.

*Journal of tropical medicine*. 2018;2018:3954717.

108. Wongsrichanalai C, Barcus MJ, Muth S, Sutamihardja A, Wernsdorfer WH. A review of malaria diagnostic tools: microscopy and rapid diagnostic test (RDT). *Am J Trop Med Hyg*. 2007;77(6 Suppl):119-27.

109. Yimam Y, Mohebalı M, Abbaszadeh Afshar MJ. Comparison of diagnostic performance between conventional and ultrasensitive rapid diagnostic tests for diagnosis of malaria: A systematic review and meta-analysis. *PloS one*. 2022;17(2):e0263770.

110. Zuniga MA, Mejia RE, Sanchez AL, Sosa-Ochoa WH, Fontecha GA. Glucose-6-phosphate dehydrogenase deficiency among malaria patients of Honduras: a descriptive study of archival blood samples. *Malar J*. 2015;14:308.

Supplementary File 6: Characteristics of Included Studies

| Author , year        | Design and sample size                                                                                                     | Loss to follow up | Country, Setting                                                           | Transmission, Parasite & Prevalence                                                                                                                              | Population                                                          | Intervention                                                                                                                  | Comparator                         | Patient-important outcomes                                                                           |
|----------------------|----------------------------------------------------------------------------------------------------------------------------|-------------------|----------------------------------------------------------------------------|------------------------------------------------------------------------------------------------------------------------------------------------------------------|---------------------------------------------------------------------|-------------------------------------------------------------------------------------------------------------------------------|------------------------------------|------------------------------------------------------------------------------------------------------|
| Experimental studies |                                                                                                                            |                   |                                                                            |                                                                                                                                                                  |                                                                     |                                                                                                                               |                                    |                                                                                                      |
| Ameyaw 2014 (21)     | iRCT<br>N=240<br>I: 121<br>C:119                                                                                           | N=0               | Ghana<br>Rural<br>Healthcare<br>(Government-owned hospital)                | High transmission season<br>Predominant parasites; ( <i>P. falciparum</i> , <i>P. vivax</i> , <i>P. ovale</i> & <i>P. malariae</i> )<br>Prevalence not specified | All children six months to 12 years with a tempt. above 37.5°C      | RDT<br>Sens.=98.0 %<br>Spec.=83.3 %                                                                                           | Routine care                       | Symptom resolution on days two and five.<br>Mortality & prescription patterns at day five (endpoint) |
| Ansah 2010 (22)      | iRCT<br><b>Microscopy setting</b><br>N=3811<br>I:1904<br>C: 1907<br><b>Clinical setting</b><br>N=3452<br>I:1725<br>C: 1727 | N=175             | Ghana<br>Rural<br>Healthcare<br>(Government-owned & private health centre) | Season not specified<br>Predominant parasite; ( <i>P. falciparum</i> )<br>Prevalence not specified                                                               | All patients considered for malaria treatment by healthcare workers | RDT<br><b>Microscopy setting:</b><br>Sens.=86.9 %<br>Spec.=88.0 %<br><b>Clinical setting:</b><br>Sens.=93.1 %<br>Spec.=90.1 % | Microscopy & Presumptive diagnosis | Prescription patterns & mortality at day 28 days.                                                    |

|                     |                                                                                                                               |               |                                                                           |                                                                                                              |                                                                                             |                                                                                                                   |                                    |                                                                                             |
|---------------------|-------------------------------------------------------------------------------------------------------------------------------|---------------|---------------------------------------------------------------------------|--------------------------------------------------------------------------------------------------------------|---------------------------------------------------------------------------------------------|-------------------------------------------------------------------------------------------------------------------|------------------------------------|---------------------------------------------------------------------------------------------|
| Ansah 2013 (23)     | cRCT<br><b>Microscopy setting:</b><br>N=2000<br>I=1000<br>C= 1000<br><b>Clinical setting:</b><br>N=2000<br>I= 1000<br>C= 1000 | Not specified | Ghana<br>Rural & urban<br>Healthcare<br>(Government-owned health centres) | Season not specified<br>Predominant parasite; ( <i>P. falciparum</i> )<br>Prevalence not specified           | All patients visiting the health facility and suspected of malaria.                         | RDT<br><b>Microscopy setting:</b><br>Sens.=87%<br>Spec.=88%<br><b>Clinical setting:</b><br>Sens.=93%<br>Spec.=90% | Microscopy & Presumptive diagnosis | Patient health cost at study endpoint<br>- Adherence to test results                        |
| Ansah 2015 (24)     | cRCT<br>N=4817<br>I: 2719<br>C: 2098                                                                                          | N=214         | Ghana<br>Rural & urban<br>Community<br>(Private pharmacies)               | High & low transmission season<br>Predominant parasite; ( <i>P. falciparum</i> )<br>Prevalence not specified | All clients reporting to a chemical shop complaining of fever or requesting an antimalarial | RDT<br>Sens.=96%<br>Spec.=70%                                                                                     | Presumptive diagnosis              | Prescription patterns during the study period & referral rate within day 28 after diagnosis |
| Baiden 2016 (25)    | cRCT<br>N=3046<br>I: 1527<br>C:1519                                                                                           | N=760         | Ghana<br>Rural<br>Healthcare<br>(Government-owned health centres)         | High transmission season<br>Predominant parasite; ( <i>P. falciparum</i> )<br>Prevalence not specified       | All febrile children aged below 24 months at the first visit                                | RDT<br>Sens.=95%<br>Spec.=64%                                                                                     | Presumptive diagnosis              | Mortality & prescription patterns during the 24 months of the study period                  |
| Batwala 2011-a (26) | CECT<br>N=52116<br>I: 17637<br>C:16971<br><presumptive arm> & 17508<br>microscopy arm>                                        | Not specified | Uganda<br>Rural<br>Healthcare<br>(Government-owned health centres)        | Low transmission season<br>Predominant parasite; ( <i>P. falciparum</i> )<br>Prevalence not specified        | All children aged between 3 & 59 months presenting at the study health centres with fever   | RDT<br>Sens. & spec. not specified                                                                                | Presumptive diagnosis & microscopy | Prescription patterns during the study period                                               |

|                     |                                                                                         |               |                                                                         |                                                                                                                  |                                                                                   |                                 |                                    |                                                                                             |
|---------------------|-----------------------------------------------------------------------------------------|---------------|-------------------------------------------------------------------------|------------------------------------------------------------------------------------------------------------------|-----------------------------------------------------------------------------------|---------------------------------|------------------------------------|---------------------------------------------------------------------------------------------|
| Batwala 2011-b (27) | cRCT<br>N= 102087<br>I:46131<br>C:23884<presumptive arm> & 32072<microscopy arm>        | Not specified | Uganda Rural Healthcare (Government-owned health centres)               | High & low transmission season<br>Predominant parasite; ( <i>P. falciparum</i> )<br>Prevalence not specified     | All outpatients presenting at the study health centres with fever                 | RDT Sens. & spec. not specified | Presumptive diagnosis & microscopy | Prescription patterns, time to treatment & time to diagnosis at the study endpoint          |
| Bisoffi 2009 (28)   | iRCT<br>N=2141<br>Dry season-813<br>I:388<br>C:425<br>Wet season-1282<br>I:636<br>C:646 | N=74          | Burkina Faso Rural & urban Healthcare (Government-owned health centres) | High & low transmission season<br>Predominant parasite; ( <i>P. falciparum</i> )<br>Prevalence not specified     | Participants aged six months and above and presenting with a temperature > 37.5°C | RDT Sens.=52%<br>Spec.=99.5%    | Presumptive diagnosis              | Symptom resolution, antimalarial & antibiotic prescription patterns & mortality at day four |
| Hansen 2017 (29)    | cRCT<br>N=2000<br>I:1000<br>C:1000                                                      | Not specified | Uganda Rural Research (Villages within selected communities)            | Moderate & low transmission season<br>Predominant parasite; ( <i>P. falciparum</i> )<br>Prevalence not specified | All children under five presenting with fever to a CHW                            | RDT Sens. & spec. not specified | Presumptive diagnosis              | Patient health cost at study endpoint                                                       |
| Mbonye 2015 (30)    | cRCT<br>N=15517<br>I:8672<br>C:6845                                                     | N=647         | Uganda Rural & peri-urban Community (Private propriety)                 | High transmission season<br>Predominant parasite; ( <i>P. falciparum</i> )<br>Prevalence not specified           | All febrile patients presenting to retail drug stores                             | RDT Sens.=91.7%<br>Spec.=63.1%  | Presumptive diagnosis              | Prescription patterns at the study endpoint                                                 |

|                                         |                                                                                               |       |                                                                              |                                                                                                                        |                                                                                  |                                     |                       |                                                                                                                    |
|-----------------------------------------|-----------------------------------------------------------------------------------------------|-------|------------------------------------------------------------------------------|------------------------------------------------------------------------------------------------------------------------|----------------------------------------------------------------------------------|-------------------------------------|-----------------------|--------------------------------------------------------------------------------------------------------------------|
| Mubi 2011 ( <a href="#">31</a> )        | Randomised crossover trial<br>N=2930<br>I:1457<br>C:1473                                      | N=61  | Tanzania Rural Healthcare & community (Government-owned health dispensaries) | High transmission season<br>Predominant parasite; (Not specified)<br>Prevalence not specified                          | History of fever in the preceding 24 hours in patients above three months        | RDT<br>Sens.=85.3 %<br>Spec.=59.8 % | Presumptive diagnosis | Prescription patterns, mortality & adherence to test results on days three, seven and twenty-eight after diagnosis |
| Mukanga 2012 ( <a href="#">32</a> )     | cRCT<br>N=4216<br>I:2084<br>C:2132                                                            | N=199 | Uganda, Burkina Faso, Ghana Rural Healthcare (Government-owned health units) | High, moderate & low transmission season<br>Predominant parasite; ( <i>P. falciparum</i> )<br>Prevalence not specified | Children aged up to 59 months with measured or history of fever (last 24 hours)  | RDT<br>Sens. & spec. not specified  | Presumptive diagnosis | Symptom resolution & prescription patterns on days zero, three and seven of the study                              |
| Ndyomugenyi 2016 ( <a href="#">33</a> ) | cRCT<br>N=2575<br>Low season;<br>I: 403<br>C: 817<br>Moderate-high season;<br>I: 656<br>C:699 | N=0   | Uganda Rural and urban Healthcare (Government-owned health units)            | High, moderate & low transmission season<br>Predominant parasite; ( <i>P. falciparum</i> )<br>Prevalence= 50%          | Febrile children aged under five years of age                                    | RDT<br>Sens.=72.1 %<br>Spec.=83.3 % | Presumptive diagnosis | Prescription patterns & time to treatment during the study                                                         |
| Reyburn 2007 ( <a href="#">34</a> )     | iRCT<br>N= 2416<br>I: 1202<br>C: 1214                                                         | N=19  | Tanzania Rural Healthcare (Government-owned hospital)                        | High & low transmission season<br>Predominant parasite; ( <i>P. falciparum</i> )<br>Prevalence not specified           | A clinician's decision to request a malaria test in a patient of any age and sex | RDT<br>Sens.=95.4 %<br>Spec.=95.9 % | Microscopy            | Prescription patterns & pre-treatment loss to follow-up at study endpoint                                          |

|                            |                                                                                                   |                  |                                                                                                                                  |                                                                                                                                                                              |                                                                                                             |                                          |                              |                                                                                                               |
|----------------------------|---------------------------------------------------------------------------------------------------|------------------|----------------------------------------------------------------------------------------------------------------------------------|------------------------------------------------------------------------------------------------------------------------------------------------------------------------------|-------------------------------------------------------------------------------------------------------------|------------------------------------------|------------------------------|---------------------------------------------------------------------------------------------------------------|
| Yeboah-Antwi 2010<br>(35)  | cRCT<br>N=3125<br>I:1017<br>C:2108                                                                | N=77             | Zambia<br>Rural<br>Healthcare &<br>community<br>(Private non-<br>profit hospitals<br>and health<br>posts)                        | High<br>transmission<br>season<br>Predominant<br>parasite; ( <i>P.<br/>falciparum</i> )<br>Prevalence not<br>specified                                                       | Children<br>aged six<br>months to 5<br>years with<br>fever or<br>cough or<br>difficult or<br>fast breathing | RDT<br>Sens.=95%<br>Spec.=75<br>%        | Presumpt<br>ive<br>diagnosis | Prescription<br>patterns,<br>symptom<br>resolution &<br>mortality on<br>days five to<br>seven of the<br>study |
| Quasi-experimental studies |                                                                                                   |                  |                                                                                                                                  |                                                                                                                                                                              |                                                                                                             |                                          |                              |                                                                                                               |
| Awor 2014 (36)             | Pre-post<br>N= 943<br>Before RDT<br>N=163<br>I:80<br>C:83<br>After RDT<br>N=780<br>I:497<br>C:283 | Not<br>specified | Uganda<br>Rural<br>Community<br>(Pharmacies)                                                                                     | High<br>transmission<br>season<br>Predominant<br>parasite; (Not<br>specified)<br>Prevalence=<br>60%                                                                          | Children &<br>their<br>caretakers<br>with a history<br>of fever,<br>cough or<br>diarrhoea                   | RDT<br>Sens. &<br>spec. not<br>specified | Presumpt<br>ive<br>diagnosis | ACT &<br>antibiotic<br>prescription<br>patterns after<br>two months                                           |
| Bruxvoort 2013 (37)        | Pre-post<br>N=3456<br>I (post-<br>RDT):1710<br>C (pre-<br>RDT):1746                               | N=0              | Tanzania<br>(Area not<br>specified)<br>Healthcare<br>(Government-<br>owned<br>hospitals,<br>health centres<br>&<br>dispensaries) | Season not<br>specified<br>Predominant<br>parasite; ( <i>P.<br/>falciparum</i> )<br>Prevalence=<br>18.6%, 17.4%<br>& 0.5% in<br>Mwanza,<br>Mtwara &<br>Mbeya<br>respectively | Outpatients<br>with fever or<br>history of<br>fever in the<br>previous 48<br>hours                          | RDT<br>Sens.=91.3<br>%<br>Spec.=88<br>%  | Microsco<br>py               | Antibiotic and<br>ACT<br>prescription<br>patterns at the<br>study endpoint                                    |

|                        |                                                                     |               |                                                                                |                                                                                                                    |                                                                                           |                                           |                          |                                                                                                                                                     |
|------------------------|---------------------------------------------------------------------|---------------|--------------------------------------------------------------------------------|--------------------------------------------------------------------------------------------------------------------|-------------------------------------------------------------------------------------------|-------------------------------------------|--------------------------|-----------------------------------------------------------------------------------------------------------------------------------------------------|
| Ishengoma 2011<br>(38) | Pre-post<br>N=7397<br>I (post-RDT):18217<br>C (pre-RDT):5576        | Not specified | Tanzania<br>Rural<br>Community<br>(Villages)                                   | Low transmission<br>season<br>Predominant<br>parasite; ( <i>P. falciparum</i> )<br>Prevalence not<br>specified     | All febrile<br>patients<br>presenting to<br>community<br>health<br>workers                | RDT<br>Sens.=89.2<br>%<br>Spec.=74.3<br>% | Microscopy               | Antimalarials<br>prescription<br>patterns at the<br>study endpoint                                                                                  |
| Msellem 2009 (39)      | Non-randomised<br>crossover trial<br>N=1887<br>I:1005<br>C: 882     | N=0           | Tanzania<br>Rural<br>Healthcare<br>(Government-<br>owned health<br>dispensary) | High<br>transmission<br>season<br>Predominant<br>parasite; ( <i>P. falciparum</i> )<br>Prevalence=<br>30%          | All patients<br>of all ages<br>with a history<br>of fever-last<br>48 hrs                  | RDT<br>Sens.=92%<br>Spec.=88<br>%         | Presumptive<br>diagnosis | Antimalarial<br>and antibiotic<br>prescription<br>patterns after<br>fourteen days<br>& the rate of<br>clinical re-<br>attendance                    |
| Ukwaja 2010 (40)       | Pre-post<br>N=100<br>I (post-RDT):50<br>C (pre-RDT):50              | N=0           | Nigeria<br>Urban<br>Healthcare<br>(Government-<br>owned health<br>centre)      | High<br>transmission<br>season<br>Predominant<br>parasite; ( <i>P. falciparum</i> )<br>Prevalence not<br>specified | Children<br>aged two<br>months to 59<br>months with<br>clinical<br>malaria &<br>pneumonia | RDT<br>Sens. &<br>spec. not<br>specified  | Presumptive<br>diagnosis | Risk of<br>prescribing<br>antimalarials,<br>symptom<br>resolution<br>during follow-<br>up and rates of<br>clinical re-<br>attendance at<br>day five |
| Observational studies  |                                                                     |               |                                                                                |                                                                                                                    |                                                                                           |                                           |                          |                                                                                                                                                     |
| Bonful 2019 (41)       | Analytical cross-<br>sectional study<br>N=2519<br>I=1007<br>C= 1512 | N=0           | Ghana<br>Urban<br>Healthcare<br>(Private non-<br>profit hospital)              | Season not<br>specified<br>Predominant<br>parasite; (Not<br>specified)<br>Prevalence not<br>specified              | Febrile<br>outpatients<br>presenting<br>with a<br>temperature<br>of 37.5°C                | RDT<br>Sens. &<br>spec. not<br>specified  | Presumptive<br>diagnosis | Inappropriate<br>ACT<br>prescription<br>patterns among<br>patients at the<br>study endpoint                                                         |

|                   |                                                                 |               |                                                                                                 |                                                                                                        |                                                                              |                                     |                       |                                                                                                                                                                  |
|-------------------|-----------------------------------------------------------------|---------------|-------------------------------------------------------------------------------------------------|--------------------------------------------------------------------------------------------------------|------------------------------------------------------------------------------|-------------------------------------|-----------------------|------------------------------------------------------------------------------------------------------------------------------------------------------------------|
| Bonko 2019 (42)   | Analytical cross-sectional study<br>N=2195<br>I= 1098<br>C=1097 | N=0           | Burkina Faso<br>Rural<br>Healthcare<br>(Government-owned hospital & health centre)              | High transmission season<br>Predominant parasite; ( <i>P. falciparum</i> )<br>Prevalence not specified | All under five yrs. children presenting with a temperature of 37.5°C & above | RDT<br>Sens. & spec.>95%            | Microscopy            | Risk of antimalarials & antibiotics prescription among RDT positive & negative patients at the study endpoint<br>Adherence to test results at the study endpoint |
| Ikwuobe 2013 (43) | Analytical cross-sectional study<br>N=1226<br>I:619<br>C:607    | Not specified | Nigeria<br>Rural & urban<br>Community<br>(Private propriety pharmacy)                           | High transmission season<br>Predominant parasite; ( <i>P. falciparum</i> )<br>Prevalence not specified | Patients with symptoms of uncomplicated malaria>10 years                     | RDT<br>Sens.=99.7 %<br>Spec.=99.5 % | Presumptive diagnosis | Antimalarials prescription patterns at the study endpoint                                                                                                        |
| Yukich 2010 (44)  | Cohort<br>N= 259<br>I: 122<br>C:137                             | N=0           | Tanzania<br>Rural & peri-urban<br>Healthcare<br>(Government-owned hospital & health dispensary) | Season not specified<br>Predominant parasite; ( <i>P. falciparum</i> )<br>Prevalence=<10 %             | All patients with uncomplicated malaria at the first visit                   | RDT<br>Sens. & spec. not specified  | Microscopy            | Patient health costs after one week                                                                                                                              |

*iRCT-Individual Randomized Controlled Trials; cRCT-Cluster Randomized Controlled Trials; N-Total number of patients included, I-Number of patients in the intervention arm (RDT); C-Number of patients in the comparator arm (Clinical diagnosis or microscopy); Sens.-Sensitivity; Spec.-Specificity; CHW-Community Health Worker; ACT-Artemisinin-based Combination Therapy, Quasi-experimental studies: Non-randomized studies of intervention.*



## Supplementary File 7: Results of the patient-important outcome measures

| Author<br>Year         | Results of the measured patient-important outcomes |                                                                                                                                                                                                                                                                                           | Patient-outcome impact                                                                                                                                                                                     |
|------------------------|----------------------------------------------------|-------------------------------------------------------------------------------------------------------------------------------------------------------------------------------------------------------------------------------------------------------------------------------------------|------------------------------------------------------------------------------------------------------------------------------------------------------------------------------------------------------------|
|                        | Diagnostic impact                                  | Therapeutic impact                                                                                                                                                                                                                                                                        |                                                                                                                                                                                                            |
| Experimental studies   |                                                    |                                                                                                                                                                                                                                                                                           |                                                                                                                                                                                                            |
| Ameyaw<br>2014<br>(21) | Not reported                                       | Not reported                                                                                                                                                                                                                                                                              | Symptom resolution;<br><b>I: 120/121 (99.2%) C: 96/119 (80.7%), P&lt;0.001</b><br>Mortality;<br>I: 0/121 (0.0%) C: 1/119 (0.8%), P=0.496                                                                   |
| Ansah 2010 (22)        | Not reported                                       | Prescription patterns;<br><i>Wrongly treated with antimalarials</i><br>Microscopy setting:<br>I: 722/1400 (51.6%), C: 764/1389 (55%), OR=0.87<br>[95% CI 0.71-1.1] P=0.16<br>Clinical setting:<br><b>I: 578/1072 (53.9%), C:982/1090 (90.1 %),<br/>OR=0.12 [95% CI 0.04-0.38] P=0.001</b> | Mortality;<br>Microscopy setting:<br>I: 4/1904 (0.0%) C: 2/1907 (0.1%)<br>Clinical setting:<br>I: 0/1725 (0.0%) C: 4/1727 (0.2%)                                                                           |
| Ansah<br>2013 (23)     | Not reported                                       | Adherence to test result<br>Microscopy setting:<br>I: 54%, C: 51%<br>Clinical setting:<br>I: 51%, C: 50%                                                                                                                                                                                  | Health costs (Ghana cedis);<br>Microscopy setting:<br>I: 6849 GHS C: 6892 GHS<br>Clinical setting:<br>I: 6924 GHS C: 7677 GHS                                                                              |
| Ansah 2015 (24)        | Not reported                                       | Prescription patterns:<br><i>Prescription of antimalarial in negative cases;</i><br><b>I: 32%, C: 88%, P&lt;0.0001, Risk ratio: 0.41 95%<br/>CI: (0.29-0.58)</b><br><i>Prescription of antibiotics in patients with negative<br/>cases;</i><br>I: 6/1854 (0.3%) C: 1/1570 (0.1%)          | Referrals<br><b>Less than 1.5% (13/1071) of all the slide-<br/>positive clients were referred to another health<br/>facility, with the majority being from the rapid<br/>diagnostic test arm (p=0.024)</b> |
| Baiden<br>2016 (25)    | Not reported                                       | Prescription patterns:<br><i>ACT;</i><br><b>I: 72.3% C: 80.8% P=0.02</b><br><i>Antibiotic;</i><br>I: 54.8% C: 56.2% P=0.78                                                                                                                                                                | Mortality;<br>I: 15/1527 (1.0%) C: 21/1519 (1.4%), P=0.31                                                                                                                                                  |

|                     |                                                                                                                                                                                             |                                                                                                                                                                                                                                                                                                                                                                                                                  |                                                                                                                                                                                                                                                      |
|---------------------|---------------------------------------------------------------------------------------------------------------------------------------------------------------------------------------------|------------------------------------------------------------------------------------------------------------------------------------------------------------------------------------------------------------------------------------------------------------------------------------------------------------------------------------------------------------------------------------------------------------------|------------------------------------------------------------------------------------------------------------------------------------------------------------------------------------------------------------------------------------------------------|
| Batwala 2011 (26)-a | Not reported                                                                                                                                                                                | Prescription of antibiotics;<br>I: 810/17637 (56.2%) 95% CI: (56.3-58.7), C: <presumptive> 7040/16971 (41.5%) 95% CI: (40.7-42.2), <microscopy> 273/ 17508 (17.6%) 95% CI: (15.7-19.5)                                                                                                                                                                                                                           | Not reported                                                                                                                                                                                                                                         |
| Batwala 2011 (27)-b | Time to diagnosis:<br><i>Mean patient time in minutes (mean/95%CI):</i><br>Overall: 62.4 [54.6-70.2], I: 37.5[32.8-42.3], C<br><Microscopy>:<br>123.9 [105.9-142.0], C<Presumptive>:<br>N/A | Antimalarial amongst patients not tested as randomized;<br>I: 870/1566 (60.3%) 95% CI: (57.9-62.8), C: <presumptive> 16931/23884 (99.7%) 95% CI: (99.6-99.8), <microscopy> 6266/ 12527(97.5%) 95% CI: (96.5-98.5)<br>Time to treatment;<br><i>Mean patient time in minutes (mean/95%CI):</i><br>[Overall: 133.7, 95% CI: (126.0-141.3), I: 109.2, 95% CI: (98.3-120.1), Microscopy: 156.1, 95% CI: (141.4-170.9) | Not reported                                                                                                                                                                                                                                         |
| Bisoffi 2009 (28)   | Not reported                                                                                                                                                                                | Prescription patterns:<br><i>Antimalarial:</i><br>Dry Season; I: 340/404 (84.2%), C: 359/448 (80.1%), P=0.13<br>Wet season; I: 605/654 (92.5%), C: 610/663 (92.0%), P=0.73<br><i>Antibiotic:</i><br>Dry season; I: 229/404 (56.7%), C: 275/448 (61.4%), P=0.16<br>Wet season; I: 331/654 (50.6%), C: 334/663 (50.3%), P=0.93                                                                                     | Symptom resolution:<br>Dry Season I:32/388 (8.2%), C:35/425(8.2%), P=0.99<br>Wet Season I:25/636 (3.9%), C:34/646(3.7%), P=0.83<br>Mortality:<br>Dry Season I:4/388 (1.0%), C:3/425(0.7%), P=0.71<br>Wet Season I:1/636 (0.15%), C:1/646(0.15%), P=1 |
| Hansen 2017 (29)    | Not reported                                                                                                                                                                                | Not reported                                                                                                                                                                                                                                                                                                                                                                                                     | Patient health cost:<br><i>Per 1000 children in U.S. dollars;</i><br>I: \$ 33, C: \$ 27                                                                                                                                                              |
| Mbonye 2015 (30)    | Not reported                                                                                                                                                                                | Prescription patterns:<br><i>Patients given appropriate treatment:</i><br><b>Cluster mean (95% CI) I: 52.8 (45.9-59.7), C: 26.8 (19.5-34.2), P&lt;0.001, Risk difference: 25.2% (12.3-38.0)</b>                                                                                                                                                                                                                  | Not reported                                                                                                                                                                                                                                         |

|                           |              |                                                                                                                                                                                                                                                                                                                                                                                                                                                                                                                                                                         |                                                                                                                                                                                                                                             |
|---------------------------|--------------|-------------------------------------------------------------------------------------------------------------------------------------------------------------------------------------------------------------------------------------------------------------------------------------------------------------------------------------------------------------------------------------------------------------------------------------------------------------------------------------------------------------------------------------------------------------------------|---------------------------------------------------------------------------------------------------------------------------------------------------------------------------------------------------------------------------------------------|
| Mubi 2011<br>(31)         | Not reported | Prescription patterns:<br><i>ACT:</i><br><b>I: 775/1457 (53.2%) C: 1422/1473 (96.5%) OR 0.039, 95% CI 0.029–0.053)</b><br>Adherence to test results:<br><b>I: 97.4% and CD arm=99.3% (OR 3.3, 95% CI 1.5–7.7)</b>                                                                                                                                                                                                                                                                                                                                                       | Mortality:<br>4 patients died during the trial- 3 children below 5 years within three days and 1 adult within seven days<br>Referrals:<br>More patients were referred on inclusion day during RDT weeks (10.0%) compared to CD weeks (1.6%) |
| Mukanga 2012<br>(32)      | Not reported | Prescription pattern:<br><i>Positive cases that did not receive ACTs;</i><br>I: 1/1740 (0.05%), C: 17/344 (4.9%)                                                                                                                                                                                                                                                                                                                                                                                                                                                        | Symptom resolution:<br><i>Fever clearance rate:</i><br>I: 99.4% 95% CI: (98.8, 99.99), C: 99.0% 95% CI: (98.7, 99.4) OR=0.64, 95% CI: (0.28, 1.49).                                                                                         |
| Ndyomugenyi 2016<br>(33)  | Not reported | Time to treatment:<br><i>Frequency of patients treated within 24 hours of onset of symptoms:</i><br>Low season; <b>I: 287 (72.1%), C: 49 (6.0%) OR: 40.3 95% CI (28.1-57.9), P&lt;0.001)</b><br>Moderate-high season; <b>I: 433 (67.0%), C: 195 (28.1%) OR: 5.92 95% CI (4.15-8.45), P&lt;0.001)</b><br>Prescription patterns:<br><i>ACTs in negative cases:</i><br>Low season; <b>I: 22 (5.81%), C: 749 (97.2%) OR: 0.00022 95% CI (0.00004-0.00125), P=0.002)</b><br>Moderate-high season; I: 67 (16.4%), C: 484 (99.2%) OR: 0.0013 95% CI (-0.0004-0.0039), P<0.001) | Not reported                                                                                                                                                                                                                                |
| Reyburn 2007<br>(34)      | Not reported | Prescription pattern:<br><i>Correct antimalarial prescription;</i><br>I: 616/1193 (51.6%) C: 606/1204 (50.3%)<br>OR=1.05, 95% CI= 0.90-1.12, P=0.524<br>Pre-treatment loss to follow-up:<br>I: 9/1202 (0.75%), C: 10/1214 (0.82%)                                                                                                                                                                                                                                                                                                                                       | Not reported                                                                                                                                                                                                                                |
| Yeboah-Antwi 2010<br>(35) | Not reported | Prescription pattern:<br><i>Antimalarial;</i><br><b>I: 265/963 (27.5%), C: 2066/2084 (99.1%) RR=0.23, 95% CI= 0.14-0.38</b><br><i>Antibiotic;</i>                                                                                                                                                                                                                                                                                                                                                                                                                       | Symptom resolution:<br><i>Hospitalized:</i><br>I: 4/1017 (0.4%), C: 14/2108 (0.7%) RR= 0.25 95% CI: 0.04-1.15<br><i>Treatment failure:</i>                                                                                                  |

|                                   |              |                                                                                                                                                                                                                                                                                                                                                                               |                                                                                                                                                                                                          |
|-----------------------------------|--------------|-------------------------------------------------------------------------------------------------------------------------------------------------------------------------------------------------------------------------------------------------------------------------------------------------------------------------------------------------------------------------------|----------------------------------------------------------------------------------------------------------------------------------------------------------------------------------------------------------|
|                                   |              | <b>I: 247/362 (68.2%) C: 22/203 (13.3%) RR=5.32, 95% CI= 2.19-8.94</b>                                                                                                                                                                                                                                                                                                        | I: 95/1017 (9.3%), C: 211/2108 (10.0%) RR= 0.68<br>95% CI: 0.39-1.19<br>Mortality:<br>I: 2/1017 (0.19%), C: 1/2108 (0.04%)                                                                               |
| <b>Quasi-experimental studies</b> |              |                                                                                                                                                                                                                                                                                                                                                                               |                                                                                                                                                                                                          |
| Awor 2014 (36)                    | Not reported | Prescription patterns:<br><i>Before (Pre)</i><br>ACT;<br>I: 12/74 (16.2%) C: 27/71 (38.0%)<br><i>Antibiotic;</i><br>I: 54/80 (65.1%) C: 36/86 (45.0%) P=0.78<br><br><i>After (Post)</i><br>ACT;<br><b>I: 393/487 (80.7%) C: 113/275 (41.1%) PR (95% CI): 4.2 (1.9–9.4)</b><br><i>Antibiotic;</i><br><b>I: 298/497 (60.0%) C: 208/283 (73.5%) PR (95% CI): 0.82(0.69–0.97)</b> | Not reported                                                                                                                                                                                             |
| Bruxvoort 2013 (37)               | Not reported | Prescription patterns:<br><i>Percentage of patients obtaining ACT before RDT</i><br><b>I: 39.9%, C: 21.3%, P&lt;0.0001)</b><br><i>Percentage of patients obtaining ACT after</i><br><b>I: 31.2% C: 48.5%, P&lt;0.0001)</b>                                                                                                                                                    | Not reported                                                                                                                                                                                             |
| Ishengoma 2011 (38)               | Not reported | Prescription patterns:<br><i>Antimalarials;</i><br>I: 32.1% C: 98.9% in cases aged more than or equal to 5 years                                                                                                                                                                                                                                                              | Not reported                                                                                                                                                                                             |
| Msellem 2009 (39)                 | Not reported | Prescription patterns:<br><i>Antimalarials;</i><br><b>I: 361/1005 (36%) C: 752/882 (85%) (OR: 0.04, 95% CI: 0.03–0.05, P&lt;0.001)</b><br><i>Antibiotics;</i><br><b>I: 372/1005 (37%) C: 235/882 (27%) (OR: 1.8, 95% CI: 1.5–2.2, P&lt;0.001)</b>                                                                                                                             | Clinical re-attendance:<br><b>I: 25/1005 (2.5%) C: 3/882 (4.9%) (OR: 0.5, 95% CI: 0.3–0.9, P&lt;0.005)</b><br>Health costs:<br><i>Average cost per patient (U.S. dollar;)</i><br>I: USD 2.47 C: USD 2.37 |

|                              |              |                                                                                                                                                                                                                                                                                                                                                |                                                                                                                                                                                                                         |
|------------------------------|--------------|------------------------------------------------------------------------------------------------------------------------------------------------------------------------------------------------------------------------------------------------------------------------------------------------------------------------------------------------|-------------------------------------------------------------------------------------------------------------------------------------------------------------------------------------------------------------------------|
| Ukwaja<br>2010<br>(40)       | Not reported | Risk of antimalarial prescription:<br><b>I: 48% C: 100% (RR 2.08, 95% CI: 1.56 to 2.78, P&lt;0.001)</b>                                                                                                                                                                                                                                        | Symptom resolution:<br>I: 47/50 (94%) C: 49/50 (98%) P=0.31<br>Clinical re-attendance:<br>I: 9/50 (18%) C: 3/50 (6%) P=0.065                                                                                            |
| <b>Observational studies</b> |              |                                                                                                                                                                                                                                                                                                                                                |                                                                                                                                                                                                                         |
| Bonful 2019<br>(41)          | Not reported | Inappropriate ACT prescription:<br><i>Patients with negative test results treated using ACTs;</i><br>145/679 (21.4%)<br><i>Patients treated presumptively using ACTs;</i><br>646/1512 (42.7%)                                                                                                                                                  | Not reported                                                                                                                                                                                                            |
| Bonko 2019 (42)              | Not reported | Prescription patterns:<br><i>Antimalarial;</i><br><b>I: 804/1098 (73.2%) C: 803/1097 (75.6%) (R.R. = 7.74 95% CI: 5.69-10.51, P &lt; 0.0001)</b><br><i>Antibiotic:</i><br><b>I: 856/1098 (77.9%) C: 856/1097 (78%) (R.R. = 3.57 95% CI: 2.37-5.38, P &lt; 0.0001)</b><br>Adherence to test results;<br>I: 762/1020 (74.7%) C: 258/1020 (25.3%) | Not reported                                                                                                                                                                                                            |
| Ikwuobe<br>2013 (43)         | Not reported | Prescription patterns:<br>Antimalarial in the negative cases: 276/535 (51.6%)<br>Antimalarial in the positive cases:<br>84/84 (100%)                                                                                                                                                                                                           | Not reported                                                                                                                                                                                                            |
| Yukich 2010<br>(44)          | Not reported | Not specified                                                                                                                                                                                                                                                                                                                                  | Patient health cost<br><i>Total mean cost per patient (Tanzanian shilling&amp; U.S. dollar):</i><br>I: \$1.02 (95% CI: 0.76-1.36), TSh 1,247, SD: 2,021, C: \$1.33 (95% CI: 0.99-1.77), TSh 1,630, SD: 1,826]; P= 0.033 |

RR-Risk ratio; PR-Prevalence ratio

Results in **bold** denote outcome measures that were reported to be statistically significant

Quasi-experimental studies: Non-randomized studies of intervention

Supplementary file 8: Summary of the methodological quality of controlled intervention studies

| Study identification | Randomisation description | Method of randomisation | Allocation concealment | Participant/provider blinding | Blinding of outcome assessor | Similarity of groups (baseline) | <20% overall drop-out rate | <15% differential drop-out rate | Adherence to study protocols | Similar background treatment | Valid outcome measurement | Sample size justification | Prespecified outcomes | Intention to treat analysis | Overall quality |
|----------------------|---------------------------|-------------------------|------------------------|-------------------------------|------------------------------|---------------------------------|----------------------------|---------------------------------|------------------------------|------------------------------|---------------------------|---------------------------|-----------------------|-----------------------------|-----------------|
| Experimental Studies |                           |                         |                        |                               |                              |                                 |                            |                                 |                              |                              |                           |                           |                       |                             |                 |
| Ameyaw 2014          | Yes                       | Yes                     | Yes                    | N/A                           | N/A                          | Yes                             | Yes                        | Yes                             | Yes                          | Yes                          | Yes                       | Yes                       | Yes                   | Yes                         | Good            |
| Ansah 2010           | Yes                       | Yes                     | Yes                    | N/A                           | N/A                          | Yes                             | Yes                        | Yes                             | C/D                          | Yes                          | Yes                       | Yes                       | Yes                   | Yes                         | Good            |
| Ansah 2013           | No                        | Yes                     | Yes                    | N/A                           | N/A                          | N/R                             | N/R                        | N/R                             | Yes                          | Yes                          | Yes                       | Yes                       | Yes                   | Yes                         | Fair            |
| Ansah 2015           | Yes                       | Yes                     | No                     | N/A                           | N/A                          | Yes                             | Yes                        | Yes                             | Yes                          | No                           | Yes                       | Yes                       | Yes                   | Yes                         | Good            |
| Baiden 2016          | Yes                       | Yes                     | N/R                    | N/A                           | N/A                          | Yes                             | No                         | Yes                             | Yes                          | Yes                          | Yes                       | Yes                       | No                    | Yes                         | Good            |
| Batwala 2011         | Yes                       | Yes                     | N/R                    | N/A                           | N/A                          | Yes                             | N/R                        | N/R                             | Yes                          | Yes                          | Yes                       | No                        | Yes                   | Yes                         | Fair            |
| Batwala 2011         | Yes                       | C/D                     | C/D                    | N/A                           | N/A                          | Yes                             | Yes                        | Yes                             | No                           | Yes                          | Yes                       | N/R                       | N/R                   | Yes                         | Fair            |
| Bisoffi 2009         | Yes                       | Yes                     | N/R                    | N/A                           | N/A                          | Yes                             | Yes                        | Yes                             | No                           | Yes                          | Yes                       | Yes                       | Yes                   | Yes                         | Good            |
| Hansen 2017          | Yes                       | N/R                     | C/D                    | N/A                           | N/A                          | Yes                             | N/R                        | N/R                             | Yes                          | Yes                          | Yes                       | Yes                       | Yes                   | Yes                         | Fair            |
| Mbonye 2015          | Yes                       | Yes                     | C/D                    | N/A                           | N/A                          | N/R                             | Yes                        | Yes                             | No                           | Yes                          | Yes                       | Yes                       | Yes                   | Yes                         | Good            |
| Mubi 2011            | Yes                       | Yes                     | Yes                    | N/A                           | N/A                          | Yes                             | Yes                        | C/D                             | Yes                          | C/D                          | Yes                       | Yes                       | Yes                   | Yes                         | Good            |
| Mukanga 2012         | Yes                       | No                      | N/R                    | N/A                           | N/A                          | Yes                             | Yes                        | Yes                             | Yes                          | Yes                          | Yes                       | Yes                       | Yes                   | Yes                         | Good            |

|                                  |     |     |     |     |     |     |     |     |     |     |     |     |     |     |      |
|----------------------------------|-----|-----|-----|-----|-----|-----|-----|-----|-----|-----|-----|-----|-----|-----|------|
| Ndyomugenyi 2016                 | Yes | Yes | N/R | N/A | N/A | Yes | Good |
| Reyburn 2007                     | Yes | Yes | Yes | N/A | N/A | Yes | Good |
| Yeboah-Antwi 2010                | Yes | Yes | N/R | N/A | N/A | N/R | Yes | Good |
| Quasi-Experimental Study Designs |     |     |     |     |     |     |     |     |     |     |     |     |     |     |      |
| Awor 2014                        | N/A | N/A | N/A | N/A | N/A | Yes | N/A | Good |
| Bruxvoort 2013                   | N/A | N/A | N/A | N/A | N/A | Yes | N/R | N/R | No  | Yes | Yes | Yes | Yes | N/A | Fair |
| Ishengoma 2011                   | N/A | N/A | N/A | N/A | N/A | Yes | C/D | C/D | No  | Yes | Yes | No  | Yes | N/A | Fair |
| Msellem 2009                     | N/A | N/A | N/A | N/A | N/A | Yes | N/A | Good |
| Ukwaja 2010                      | N/A | N/A | N/A | N/A | N/A | Yes | Yes | Yes | Yes | Yes | Yes | No  | Yes | N/A | Good |

## Supplementary file 9: Summary of the methodological quality of observational studies

| Criteria                                      | Bonful<br>2019 | Bonko<br>2019 | Ikwuobe<br>2013 | Yuckich<br>2010 |
|-----------------------------------------------|----------------|---------------|-----------------|-----------------|
| Research question                             | Yes            | Yes           | Yes             | Yes             |
| Detailed description of study population      | Yes            | Yes           | Yes             | Yes             |
| Over 50% participation rate                   | C/D            | Yes           | Yes             | Yes             |
| Sampling of subjects from the same population | Yes            | Yes           | Yes             | Yes             |
| Sample size calculation & justification       | Yes            | No            | Yes             | Yes             |
| Exposure measurement preceding outcome        | N/A            | N/A           | N/A             | Yes             |
| Sufficient time frame                         | N/A            | N/A           | N/A             | Yes             |
| Measurement of exposure at different levels   | N/A            | N/A           | N/A             | N/A             |
| Valid & reliable exposure measurement         | C/D            | Yes           | Yes             | Yes             |
| Multiple exposure assessments                 | Yes            | Yes           | No              | Yes             |
| Valid & reliable outcome measurement          | Yes            | Yes           | Yes             | Yes             |
| Blinding of outcome assessor                  | C/D            | No            | C/D             | NR              |
| Less than 20% loss to follow-up at endpoint   | Yes            | Yes           | Yes             | Yes             |
| Confounder adjustment                         | Yes            | No            | Yes             | Yes             |
| <b>Overall quality</b>                        | <b>Fair</b>    | <b>Fair</b>   | <b>Good</b>     | <b>Good</b>     |

*For observational studies, except for Yuckich et al. which was a cohort study, the remaining three studies were cross-sectional. Therefore, items regarding exposure measurement preceding outcome and sufficient time frame were not applicable for cross-sectional studies. Management of exposure at different levels was not applicable to all observational studies because mRDTs were performed at a time.*

*For experimental studies blinding was not necessary given the nature. Of the quasi-experimental studies details on randomization were not applicable due to the nature of the design.*
